# Supplementary material for: A systematic review of reported reassortant viral lineages of influenza A
Source: PubMed Central journal article supplement (PMC4702296; doi:10.1186/s12879-015-1298-9), 2016-01-05
Supplement: 12879_2015_1298_MOESM1_ESM.pdf [file 12879_2015_1298_MOESM1_ESM.pdf]

Figure-S1 Pinsent

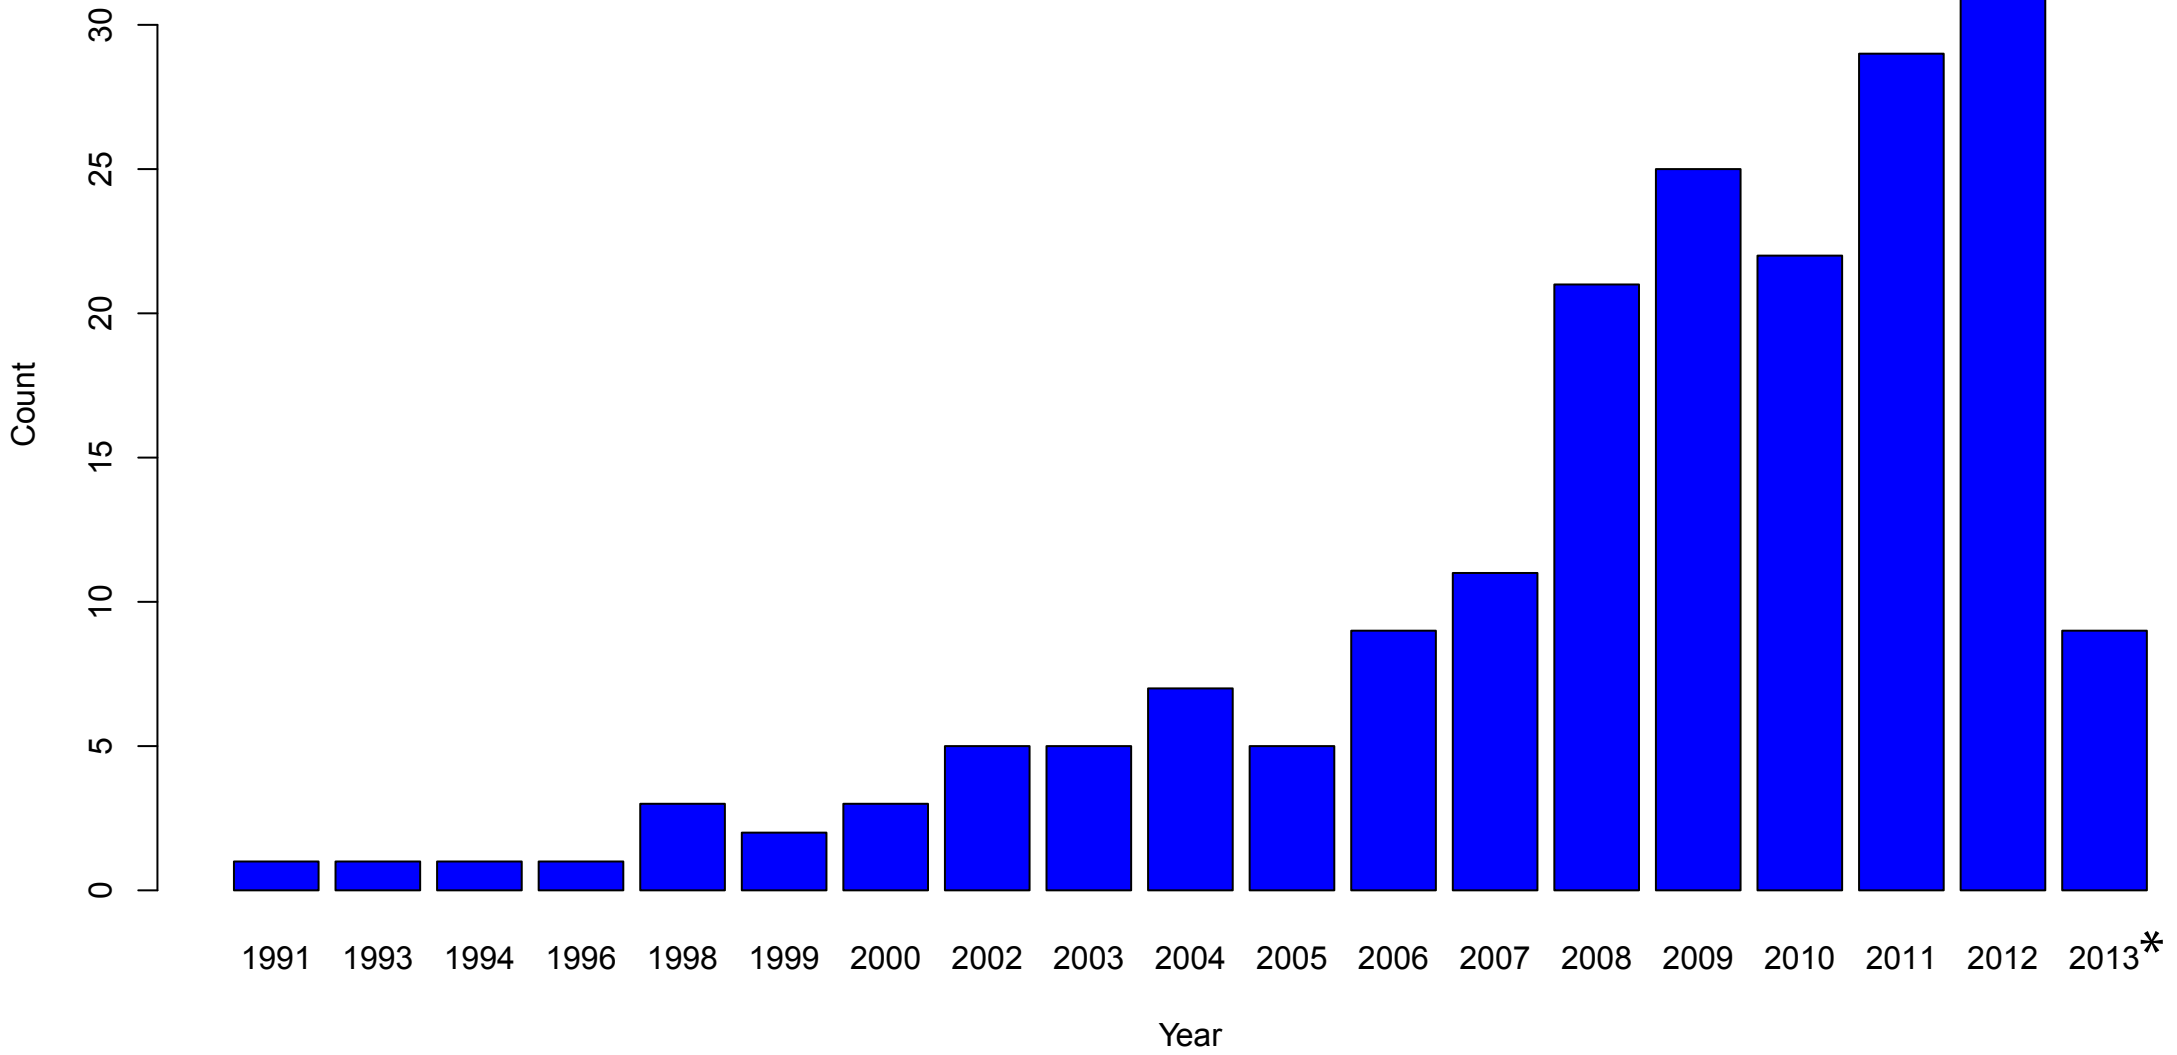

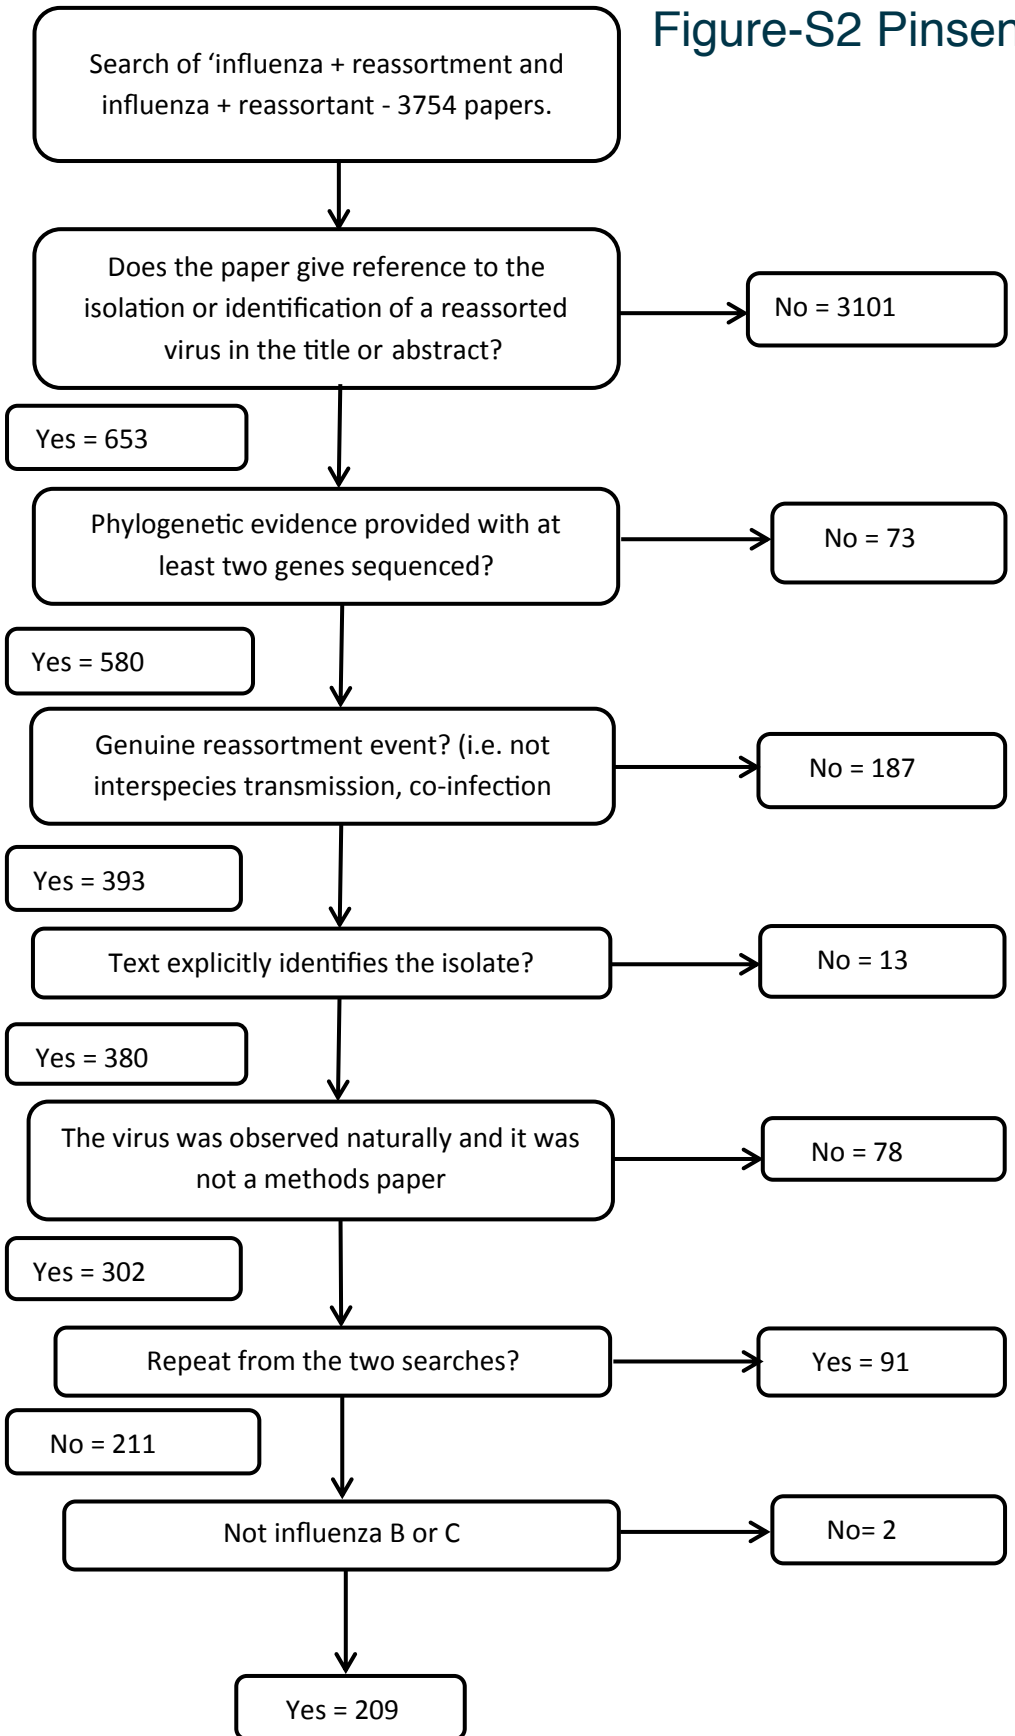

Figure-S3 Pinsent

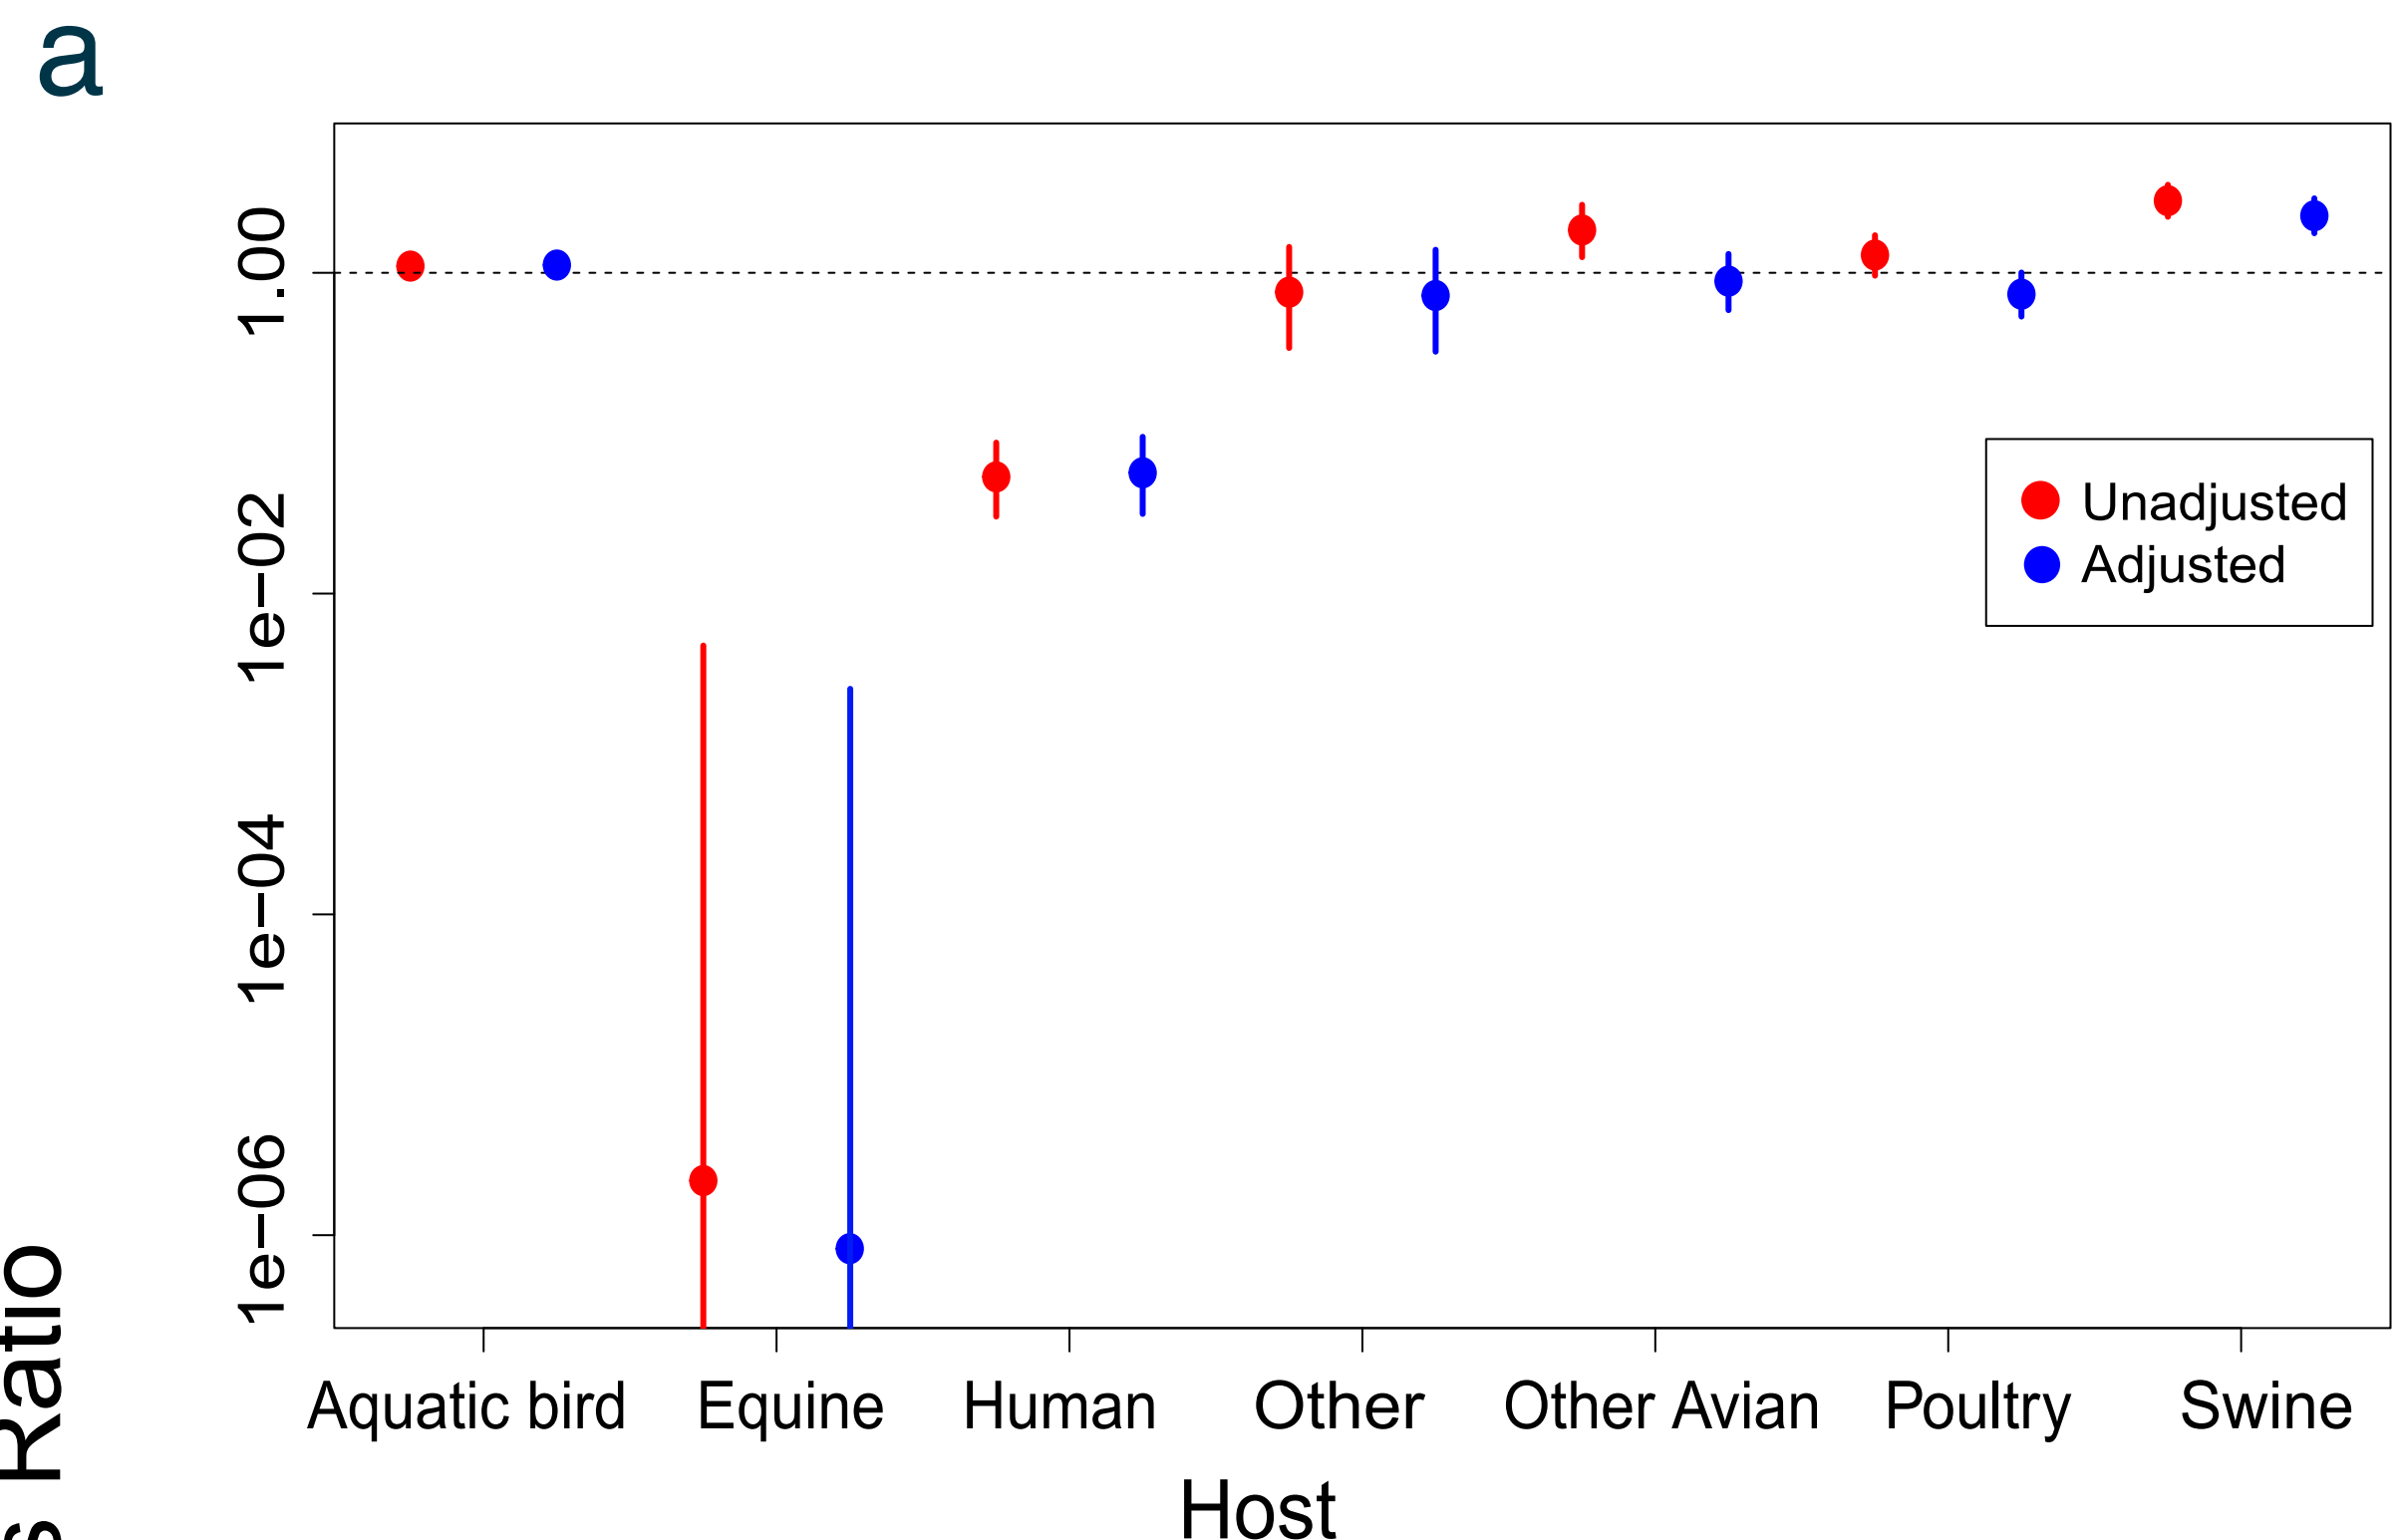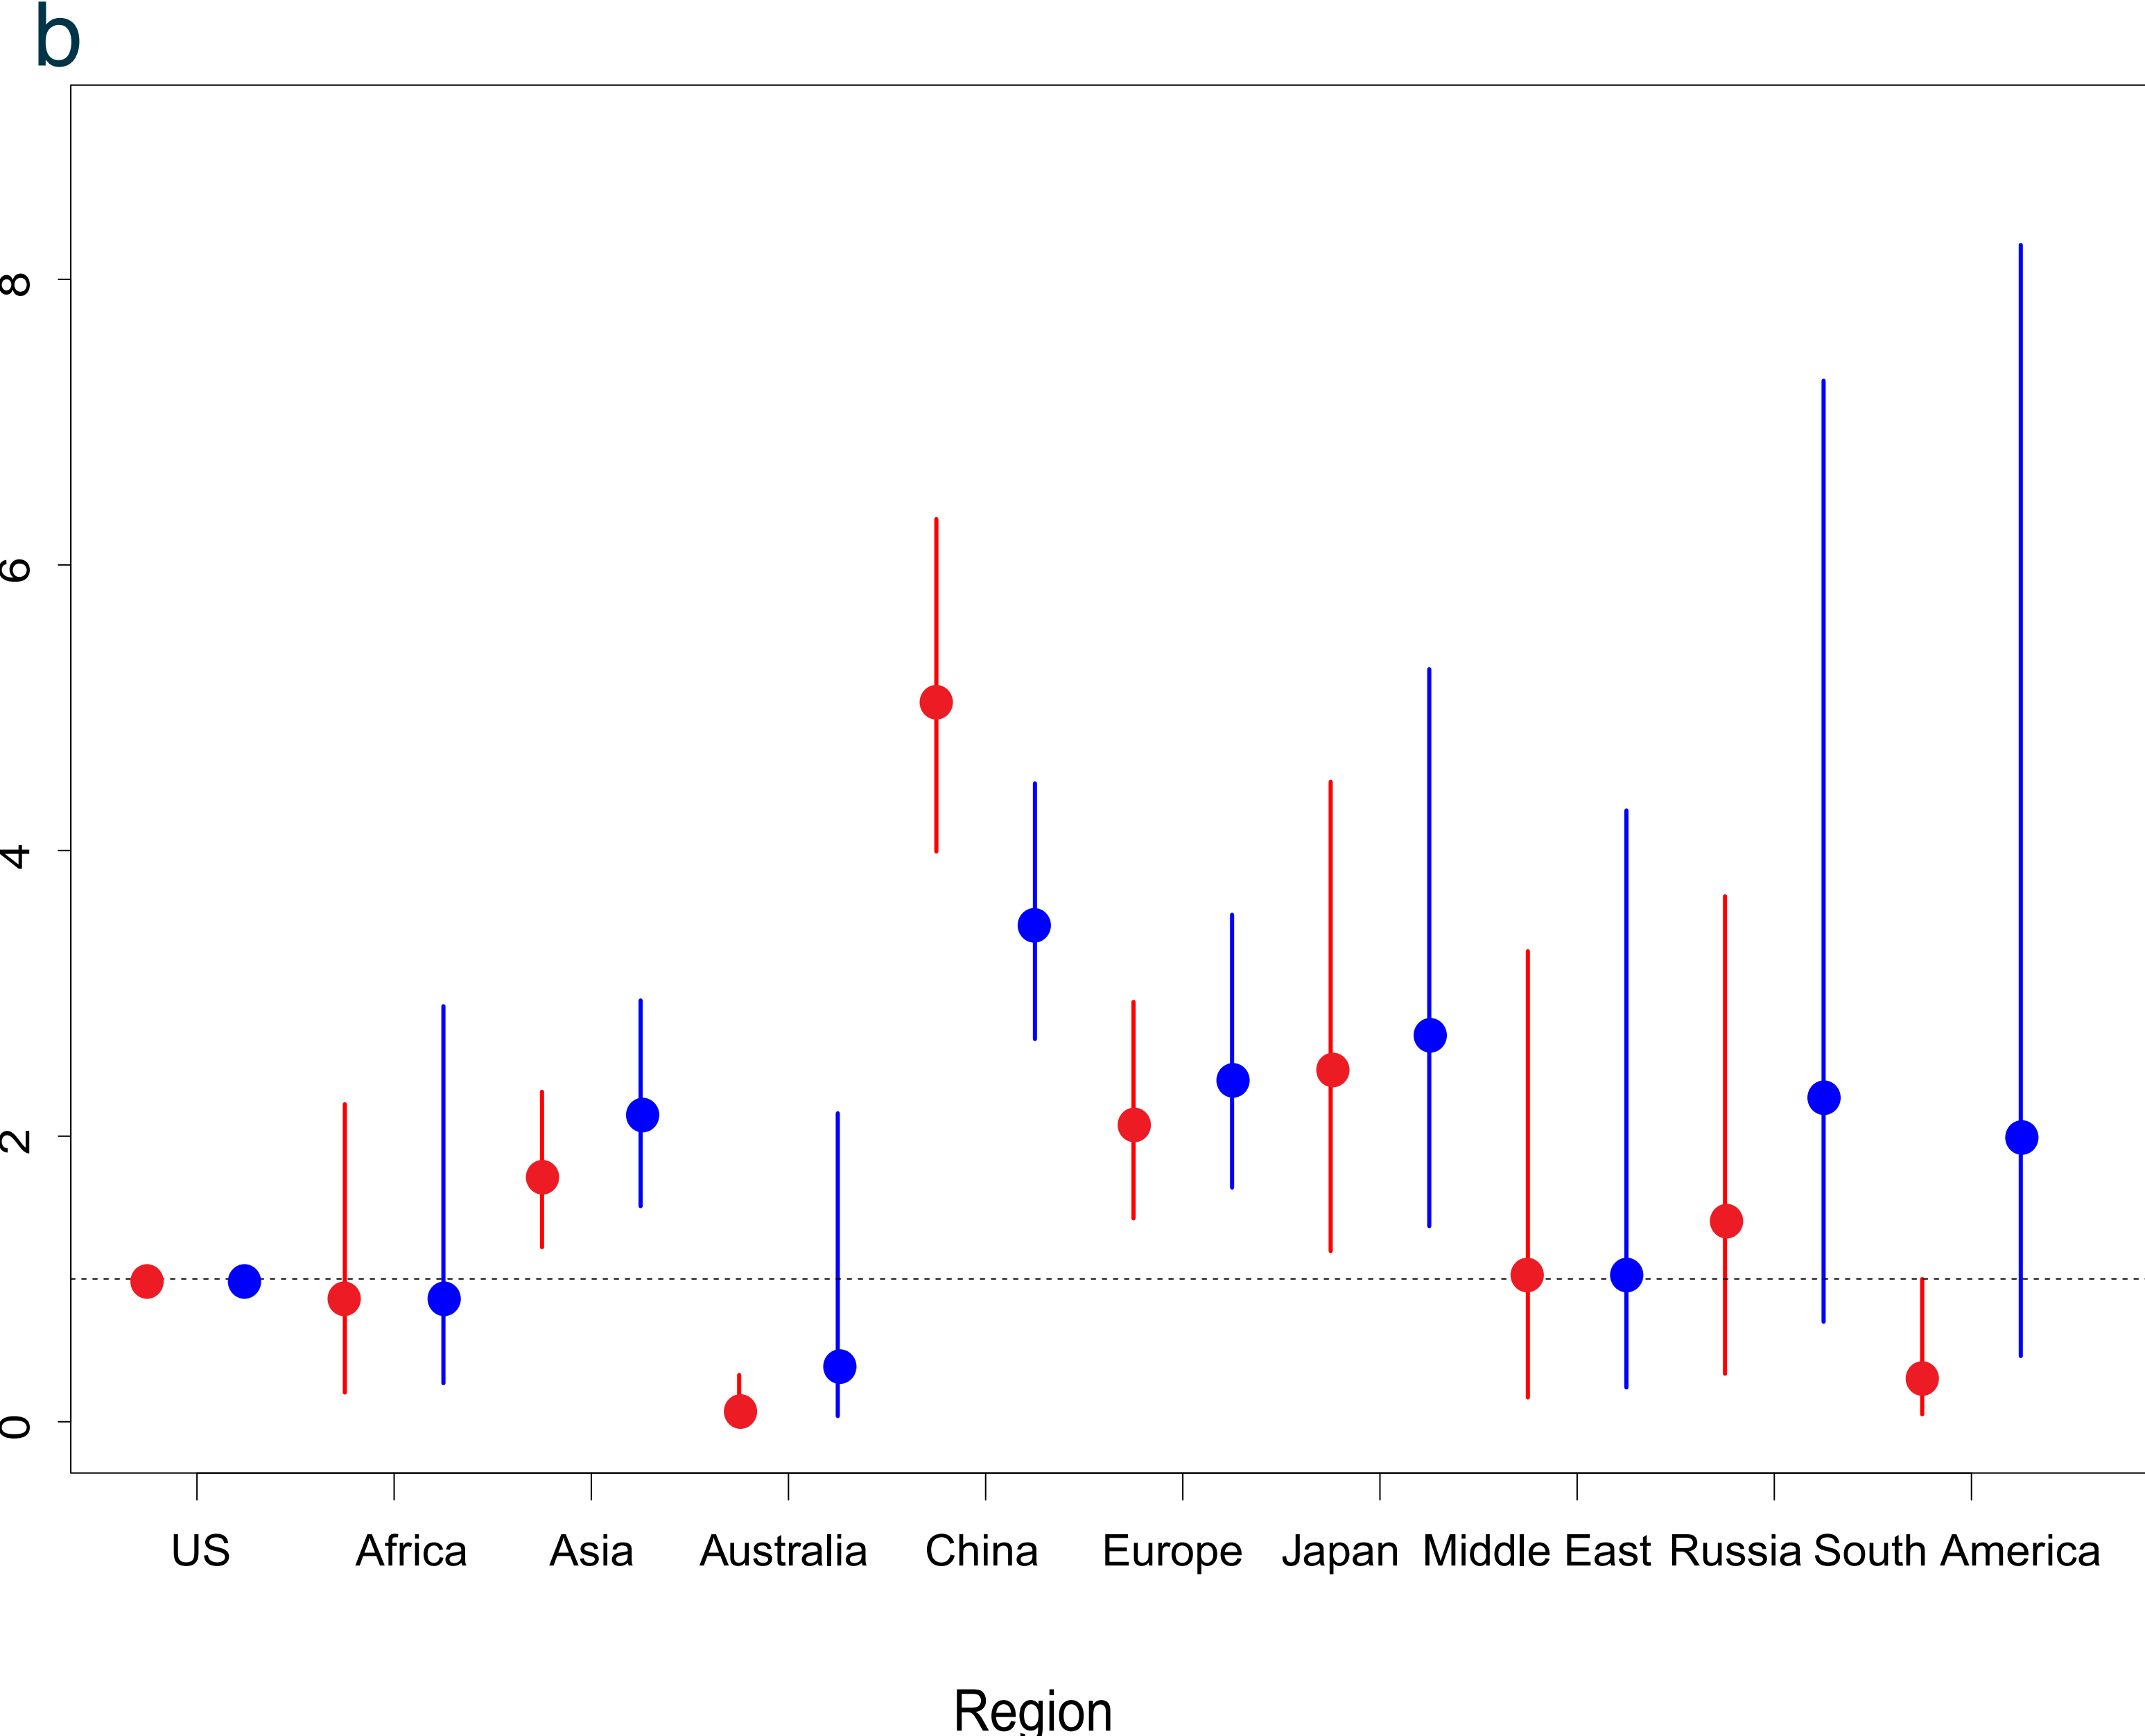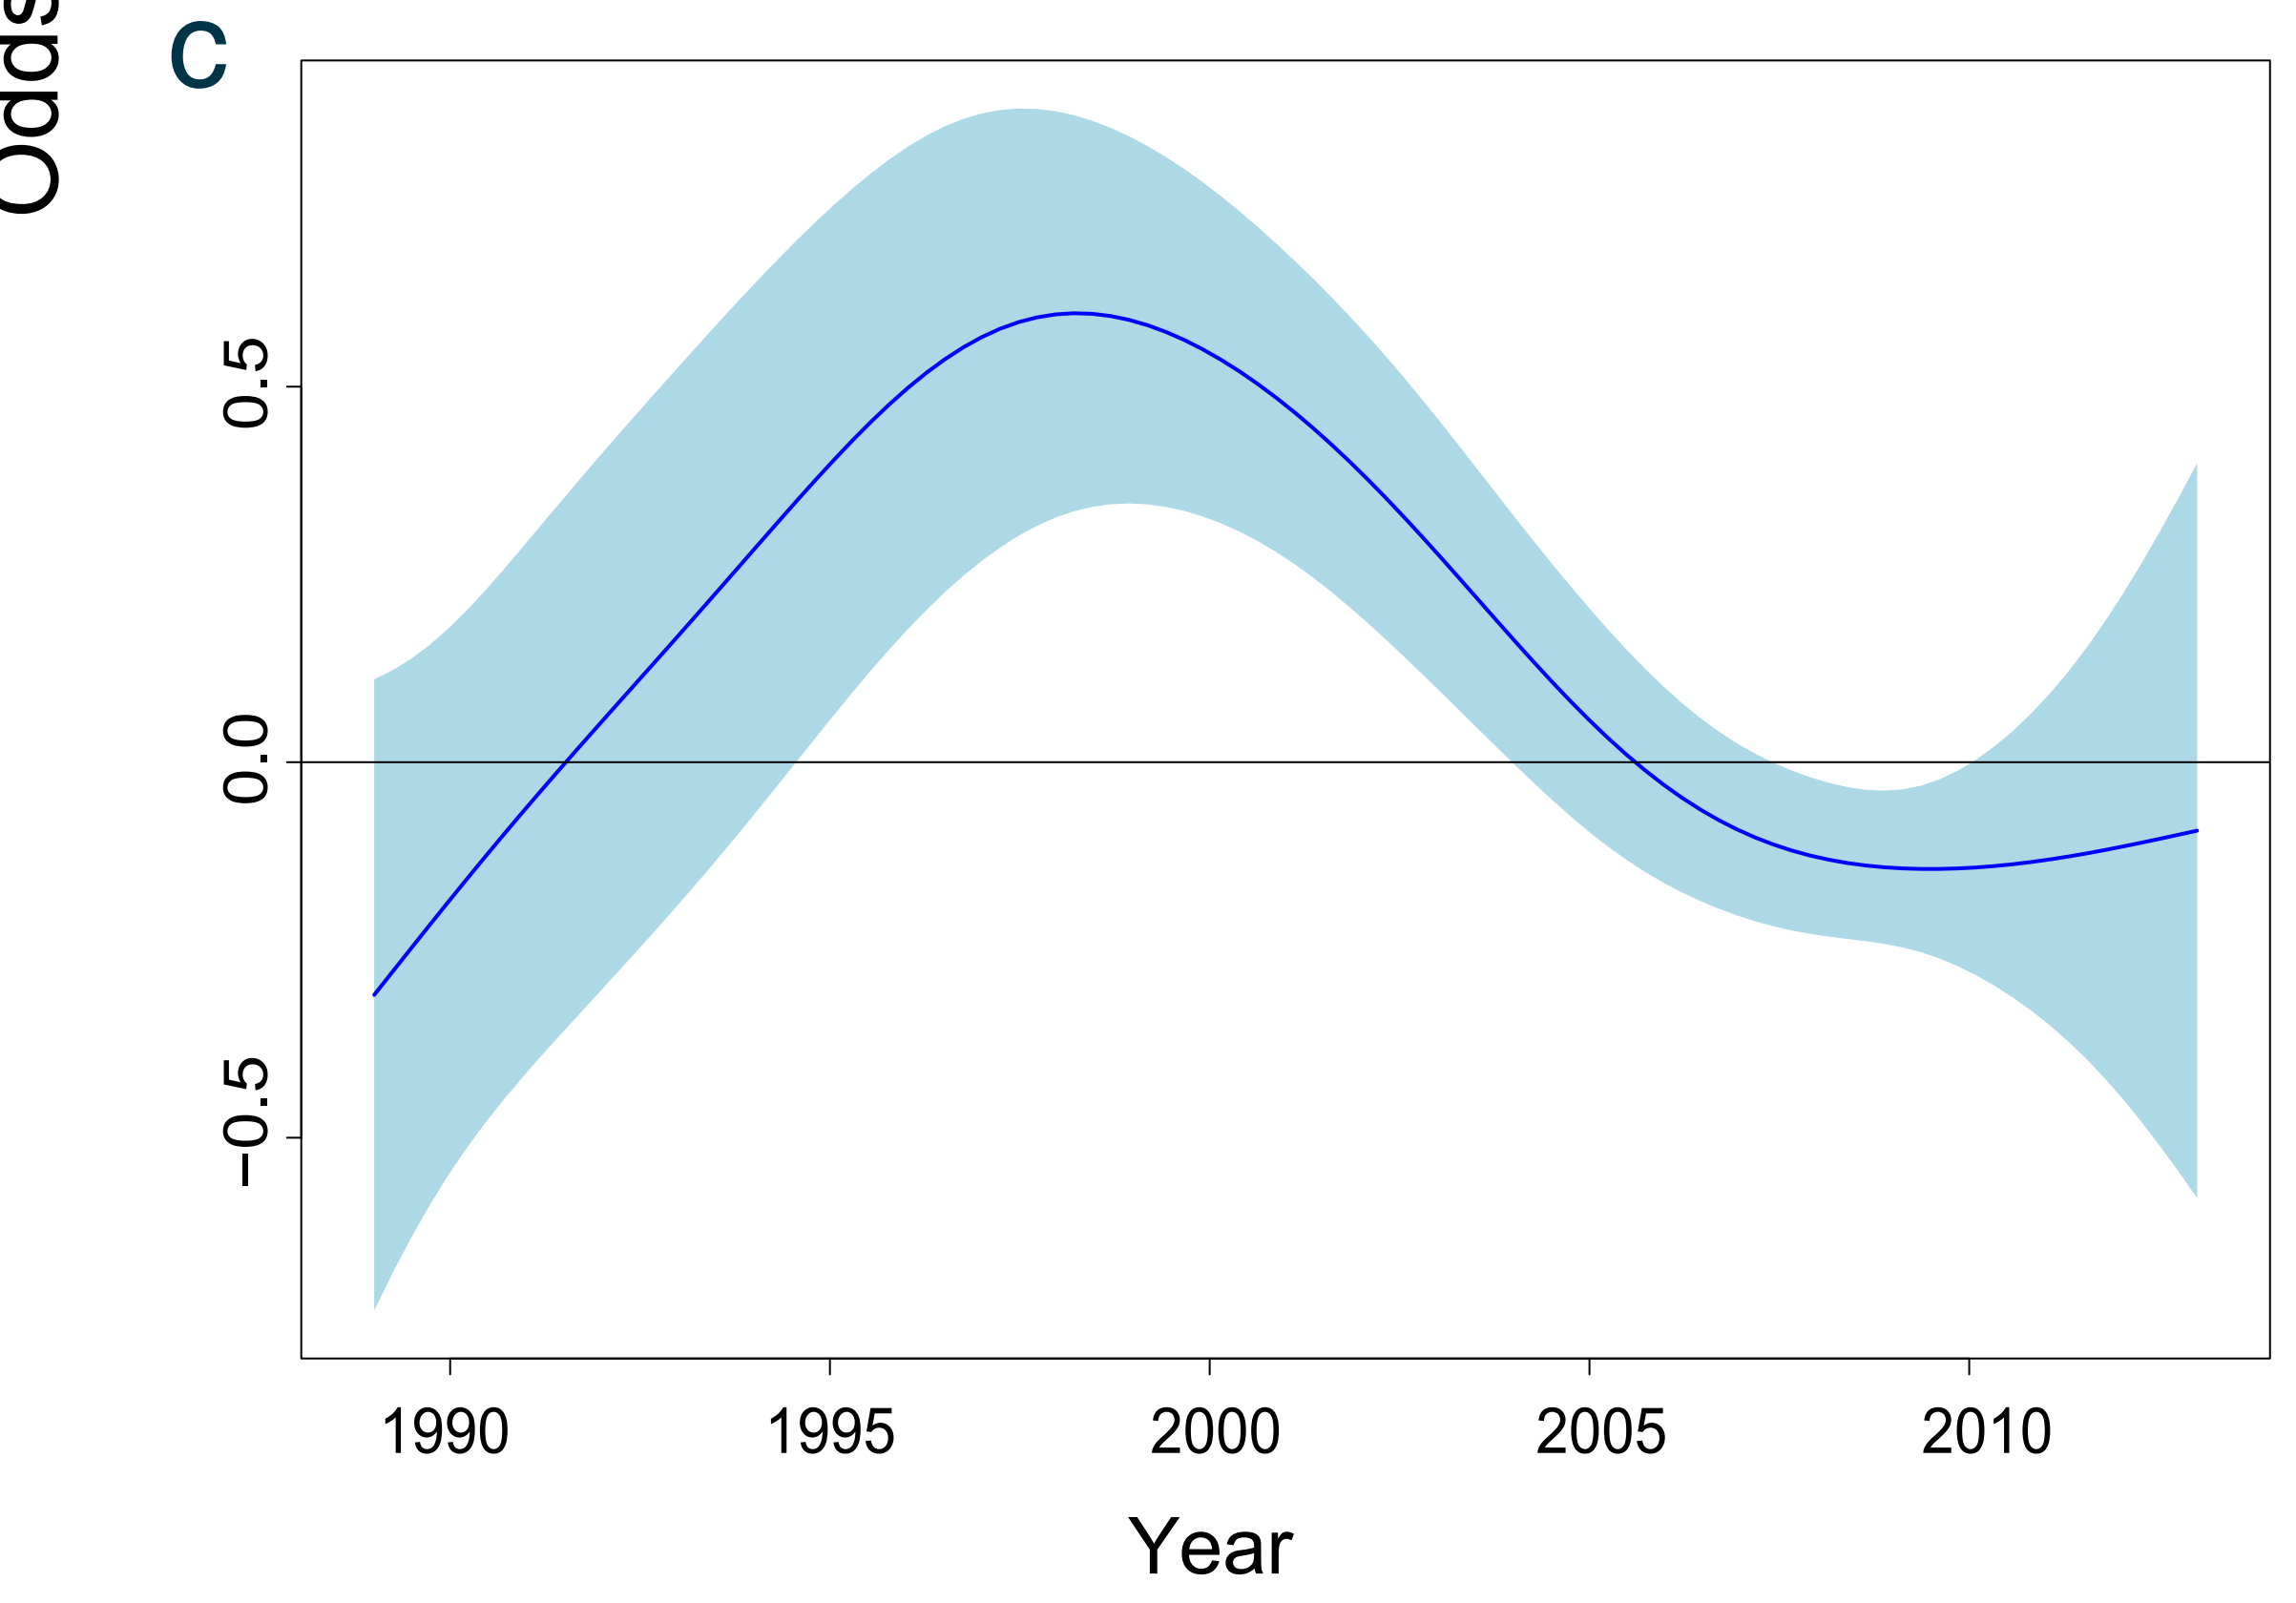

Figure-S4 Pinsent

a

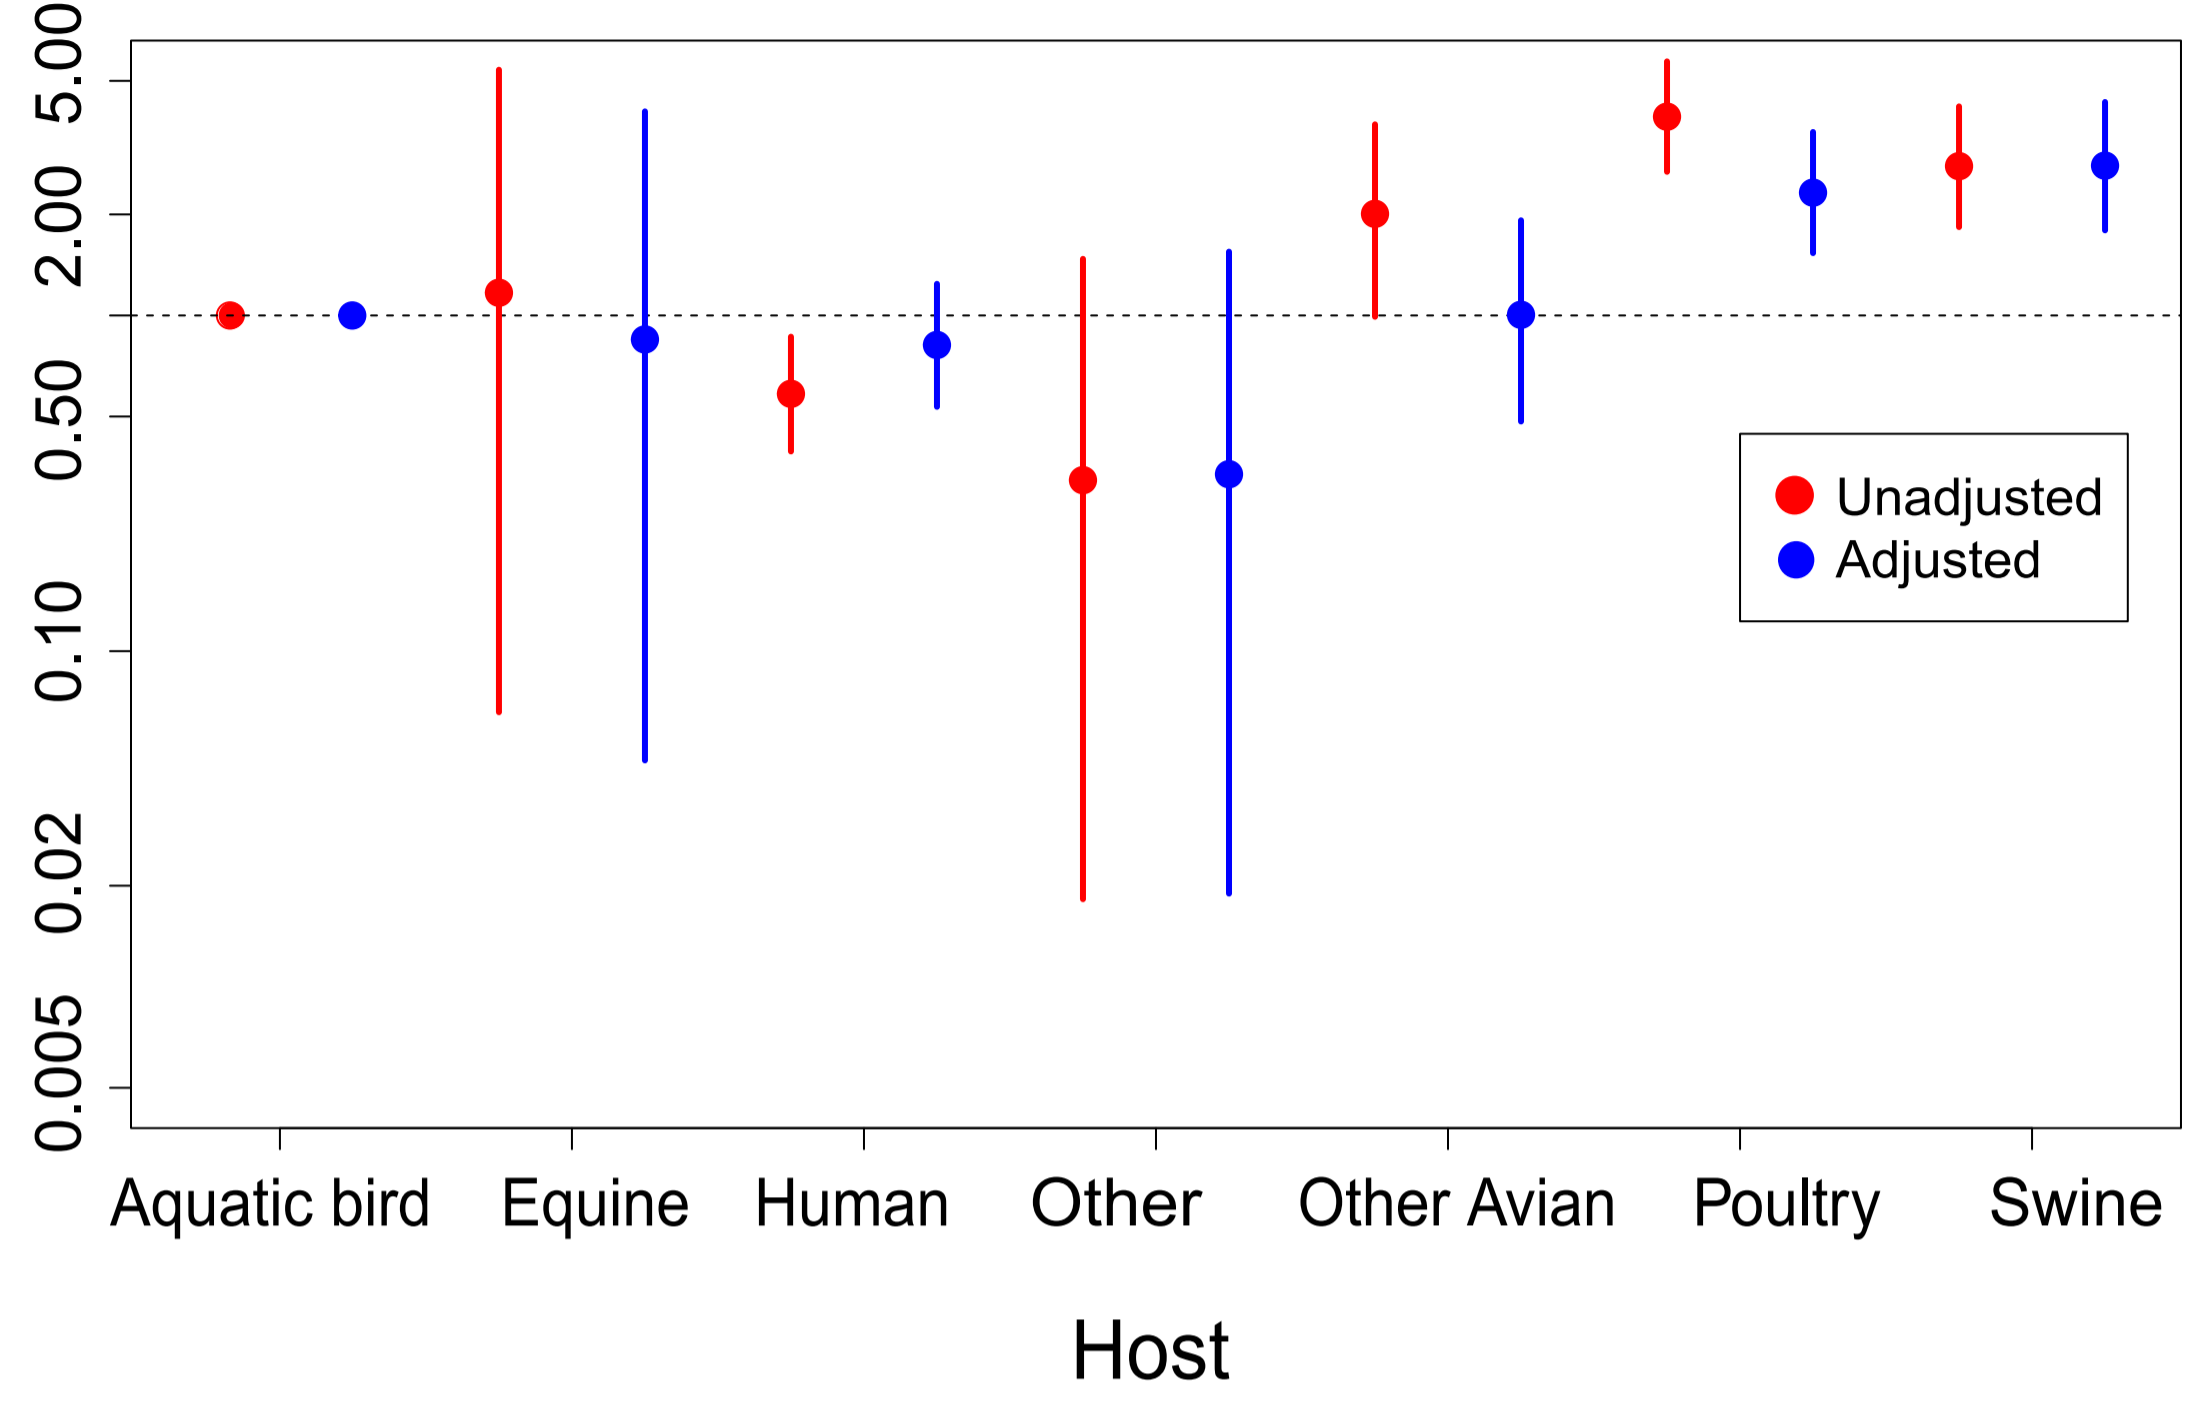

b

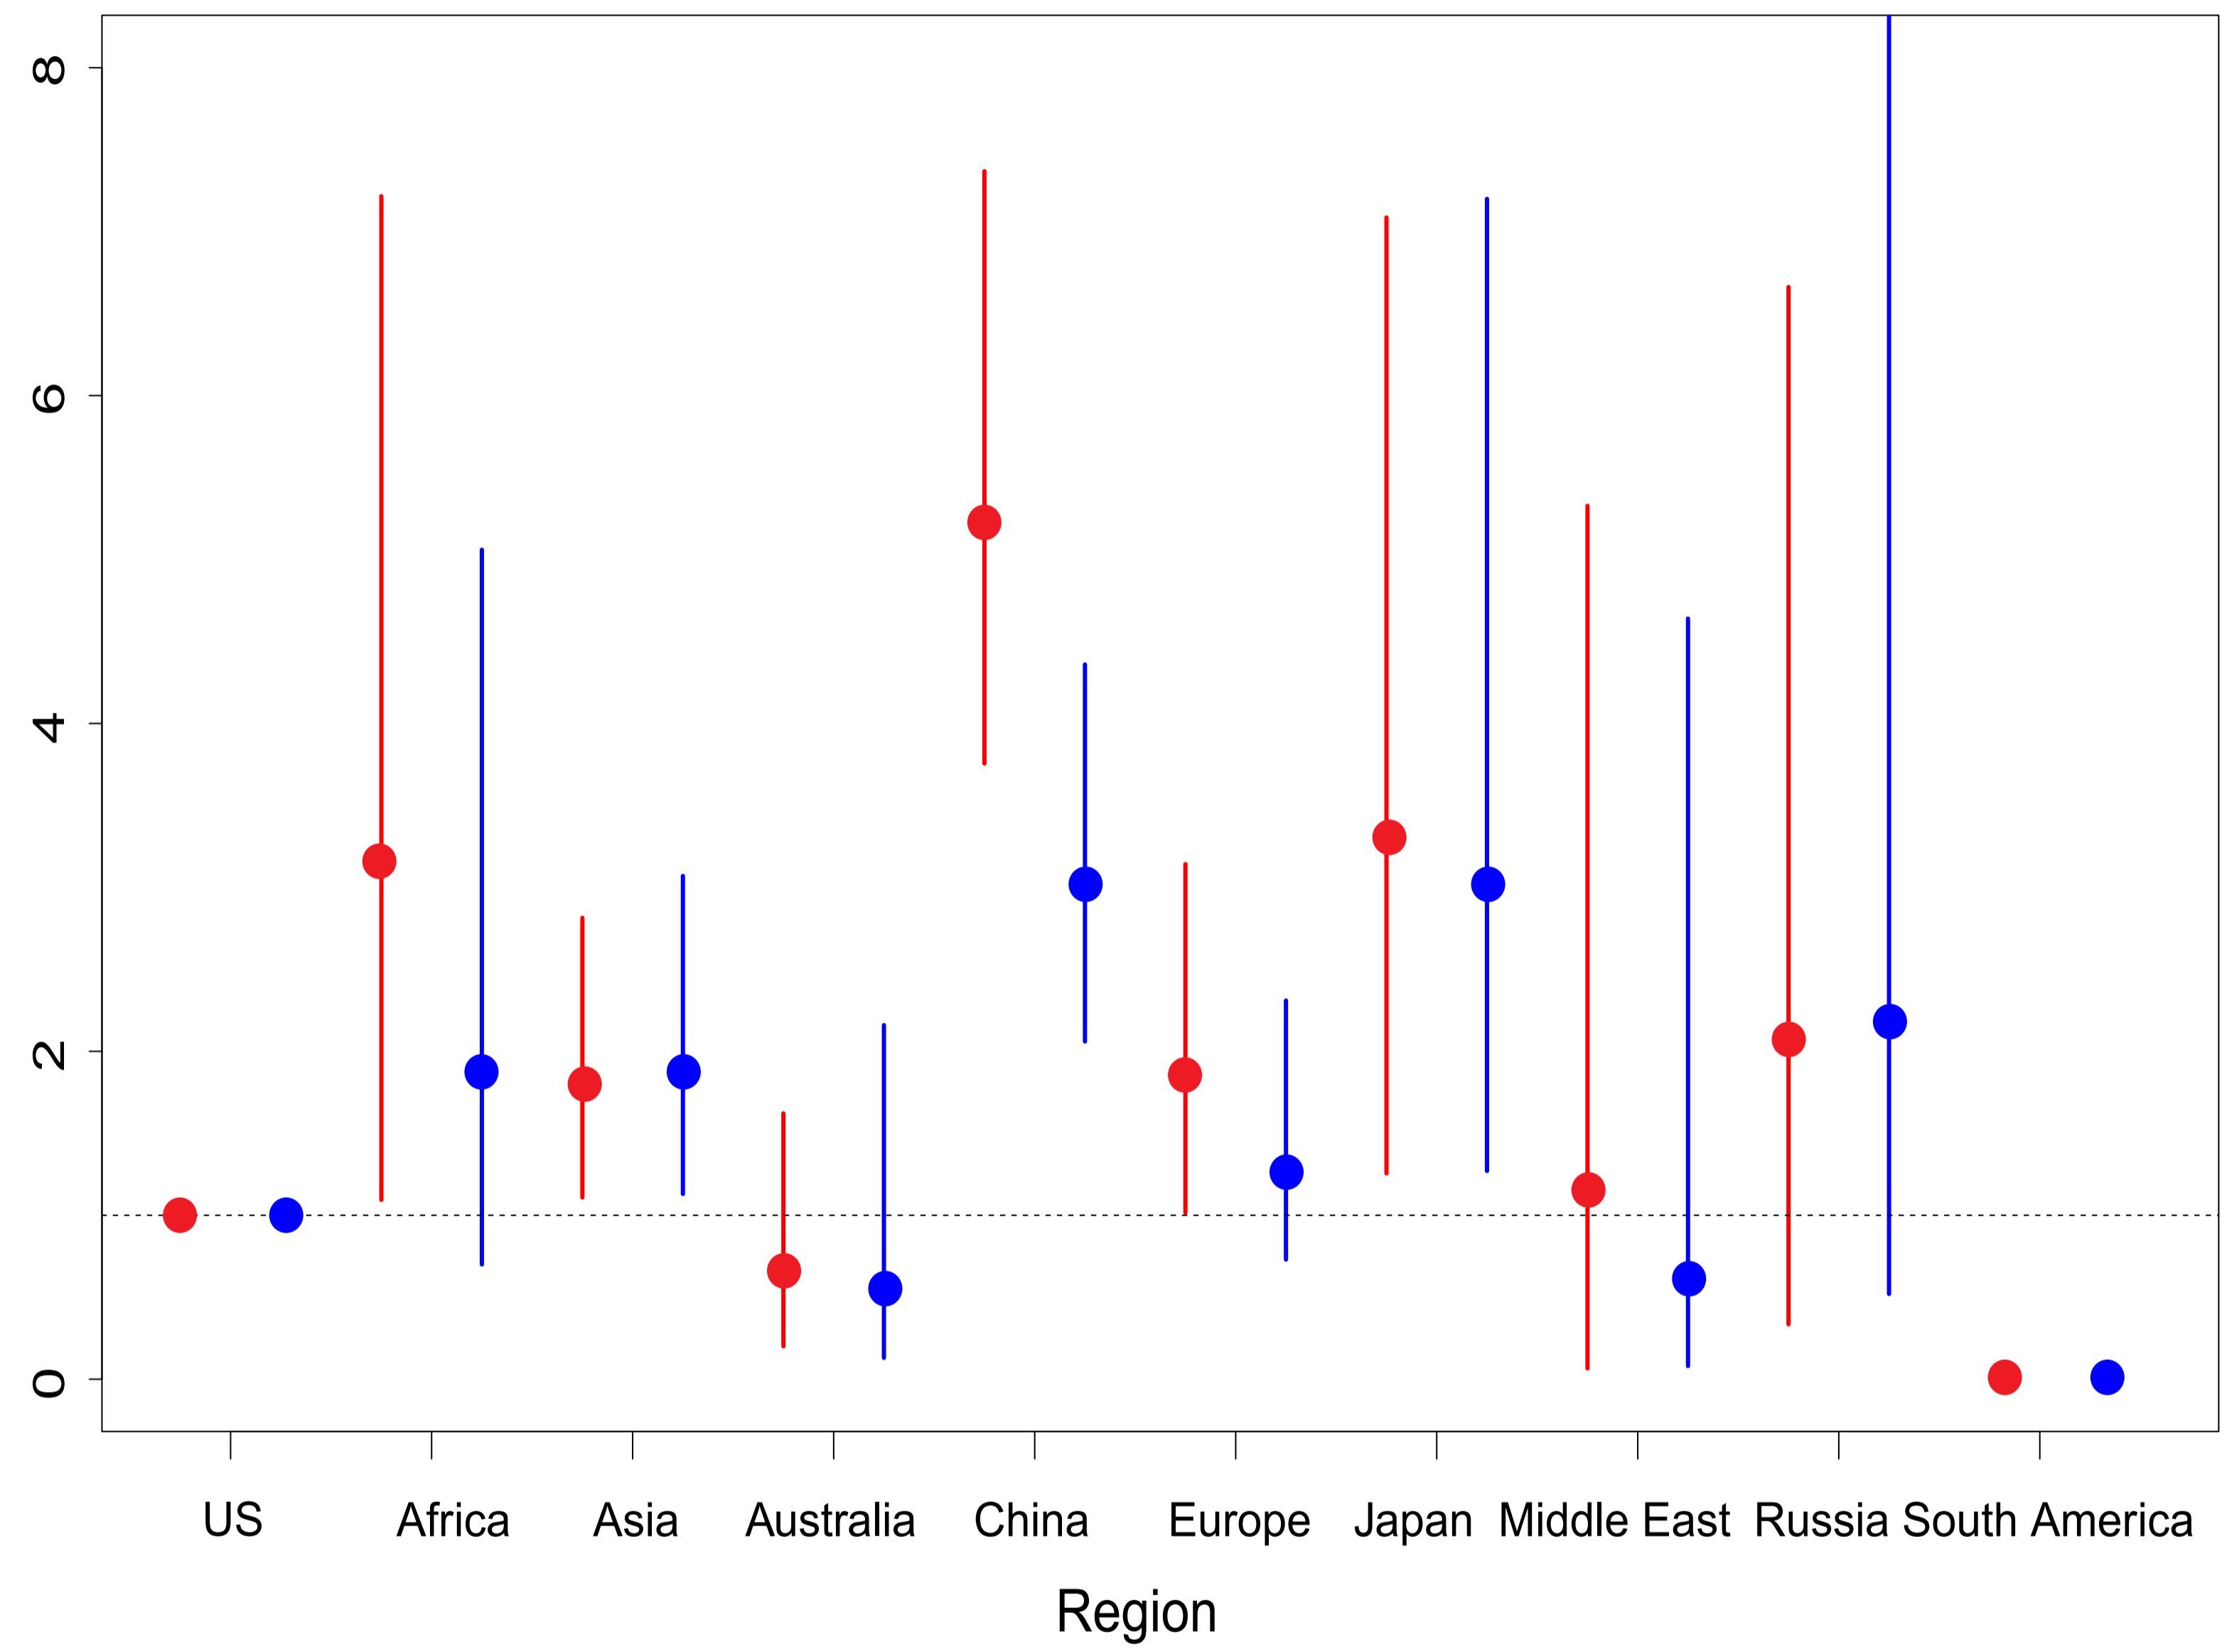

c

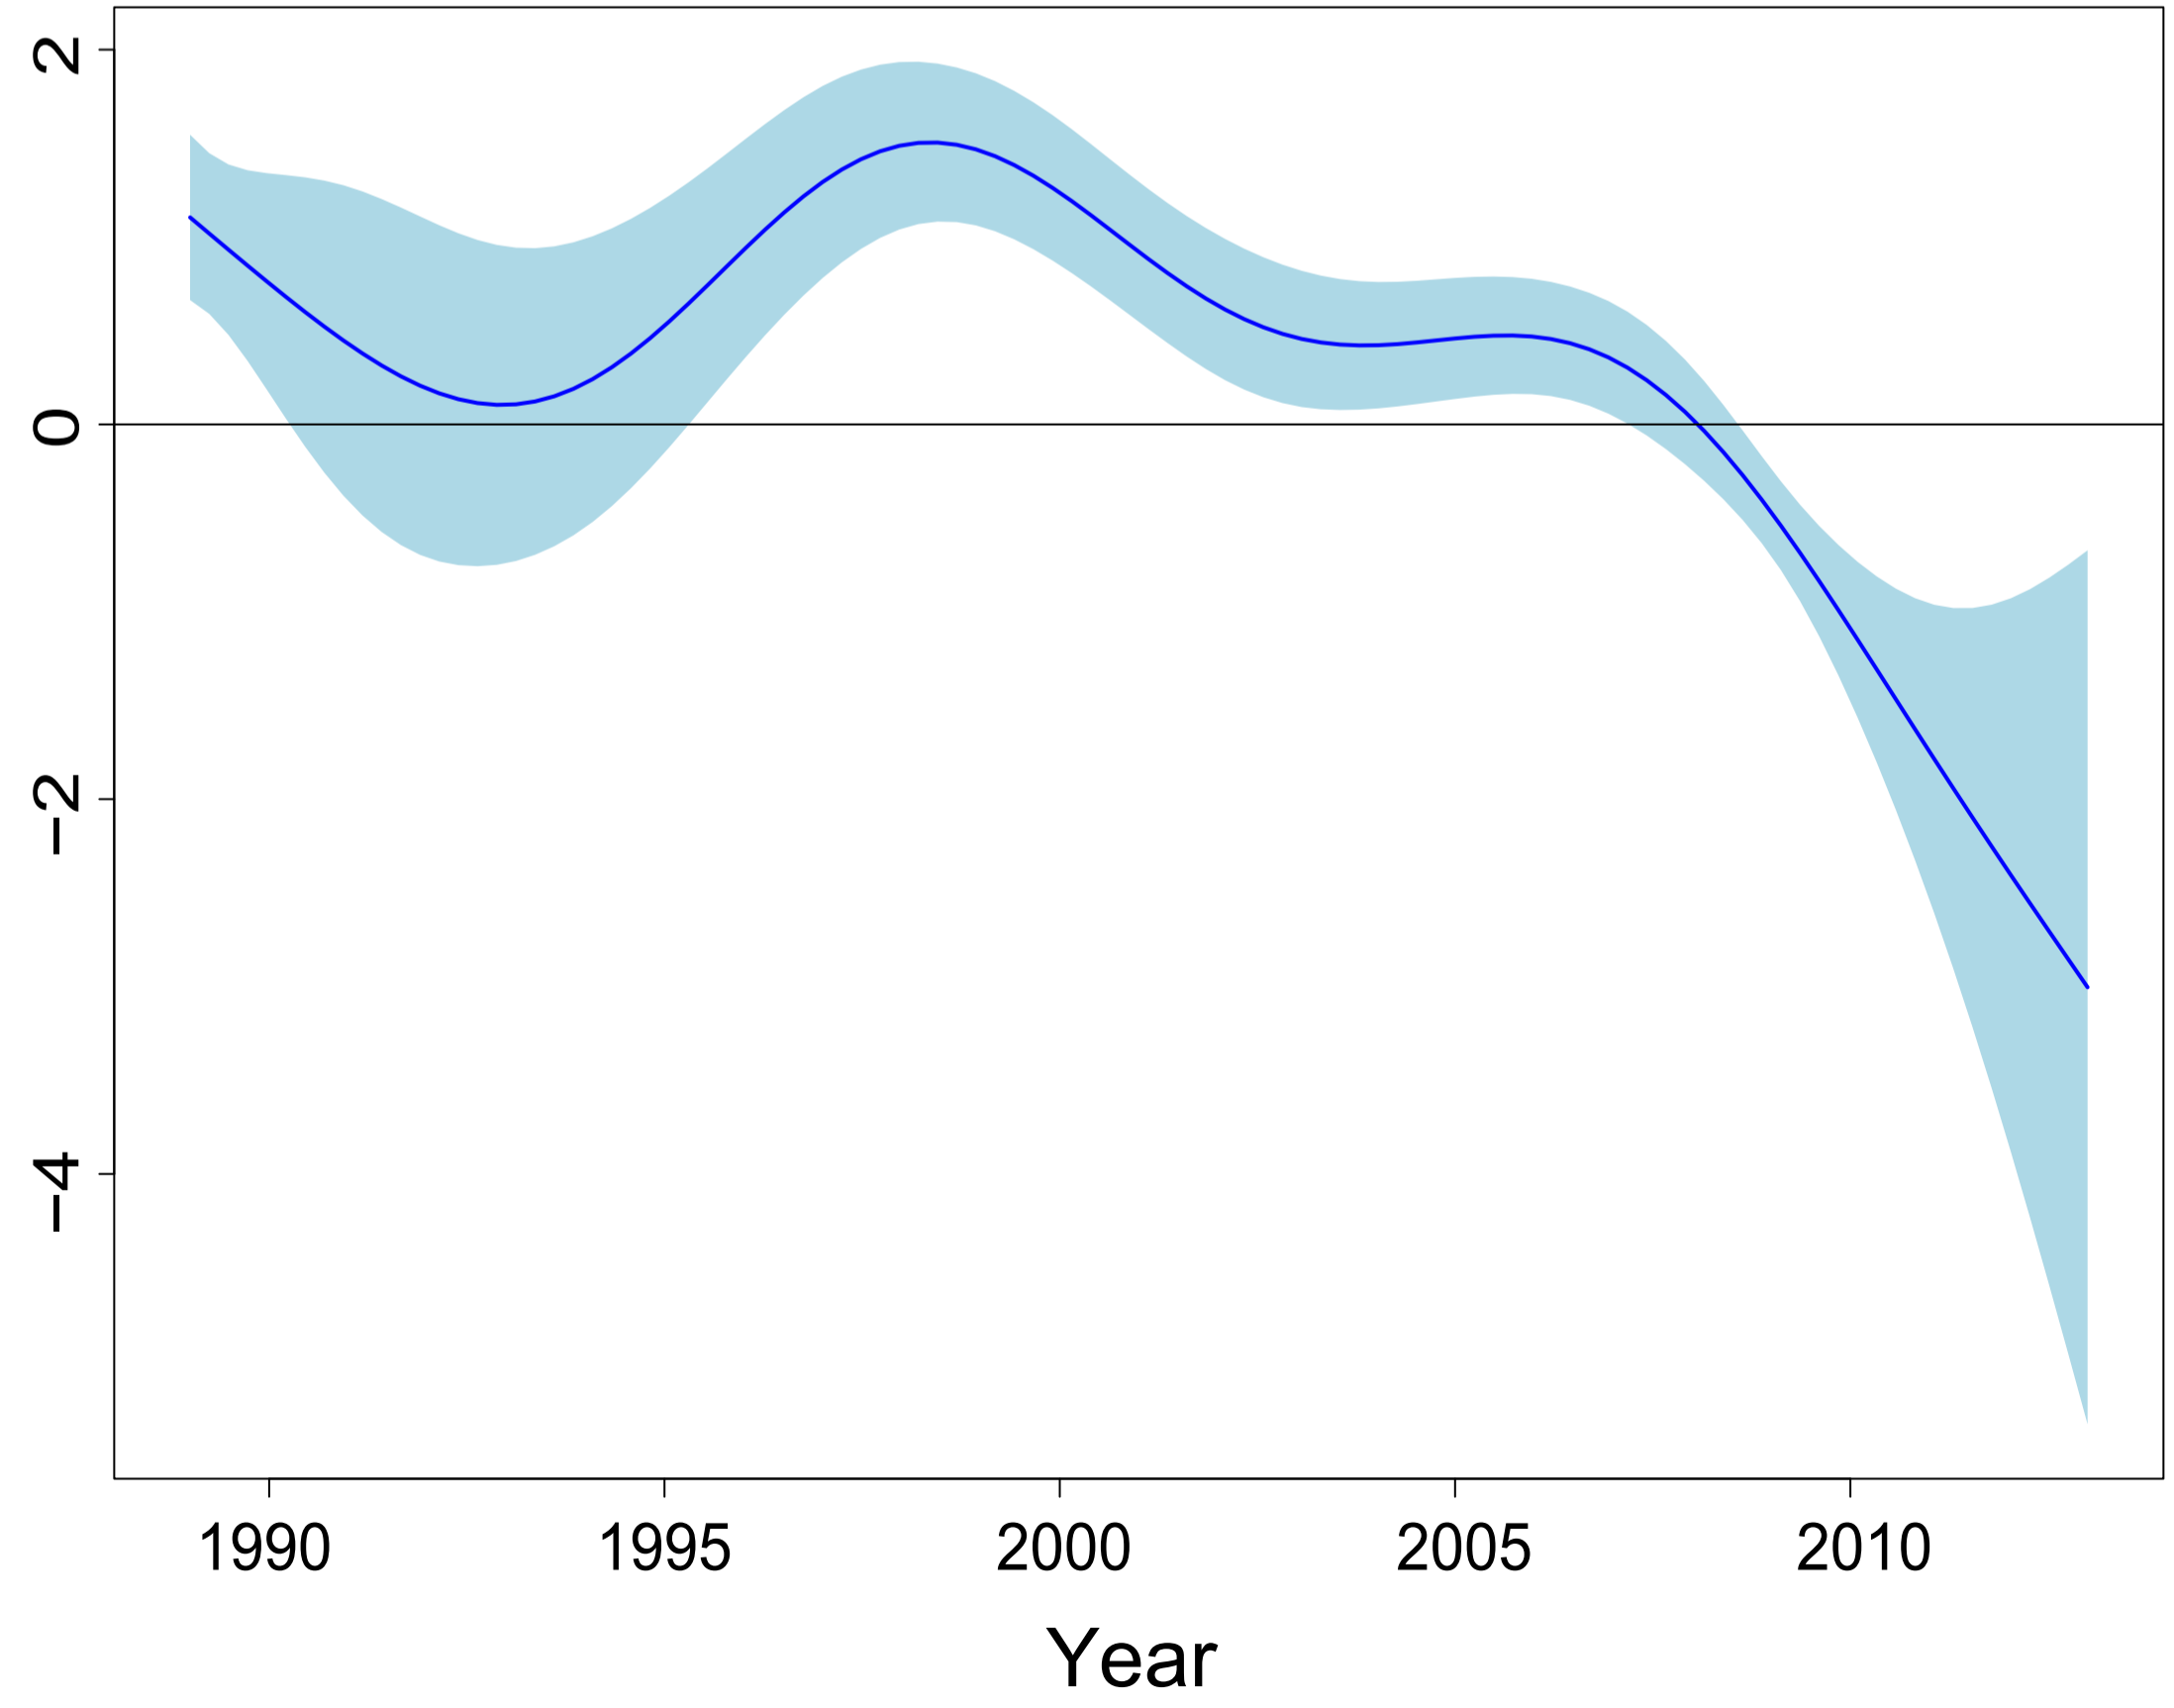

Figure S5 Pinsent

**a** **Swine**

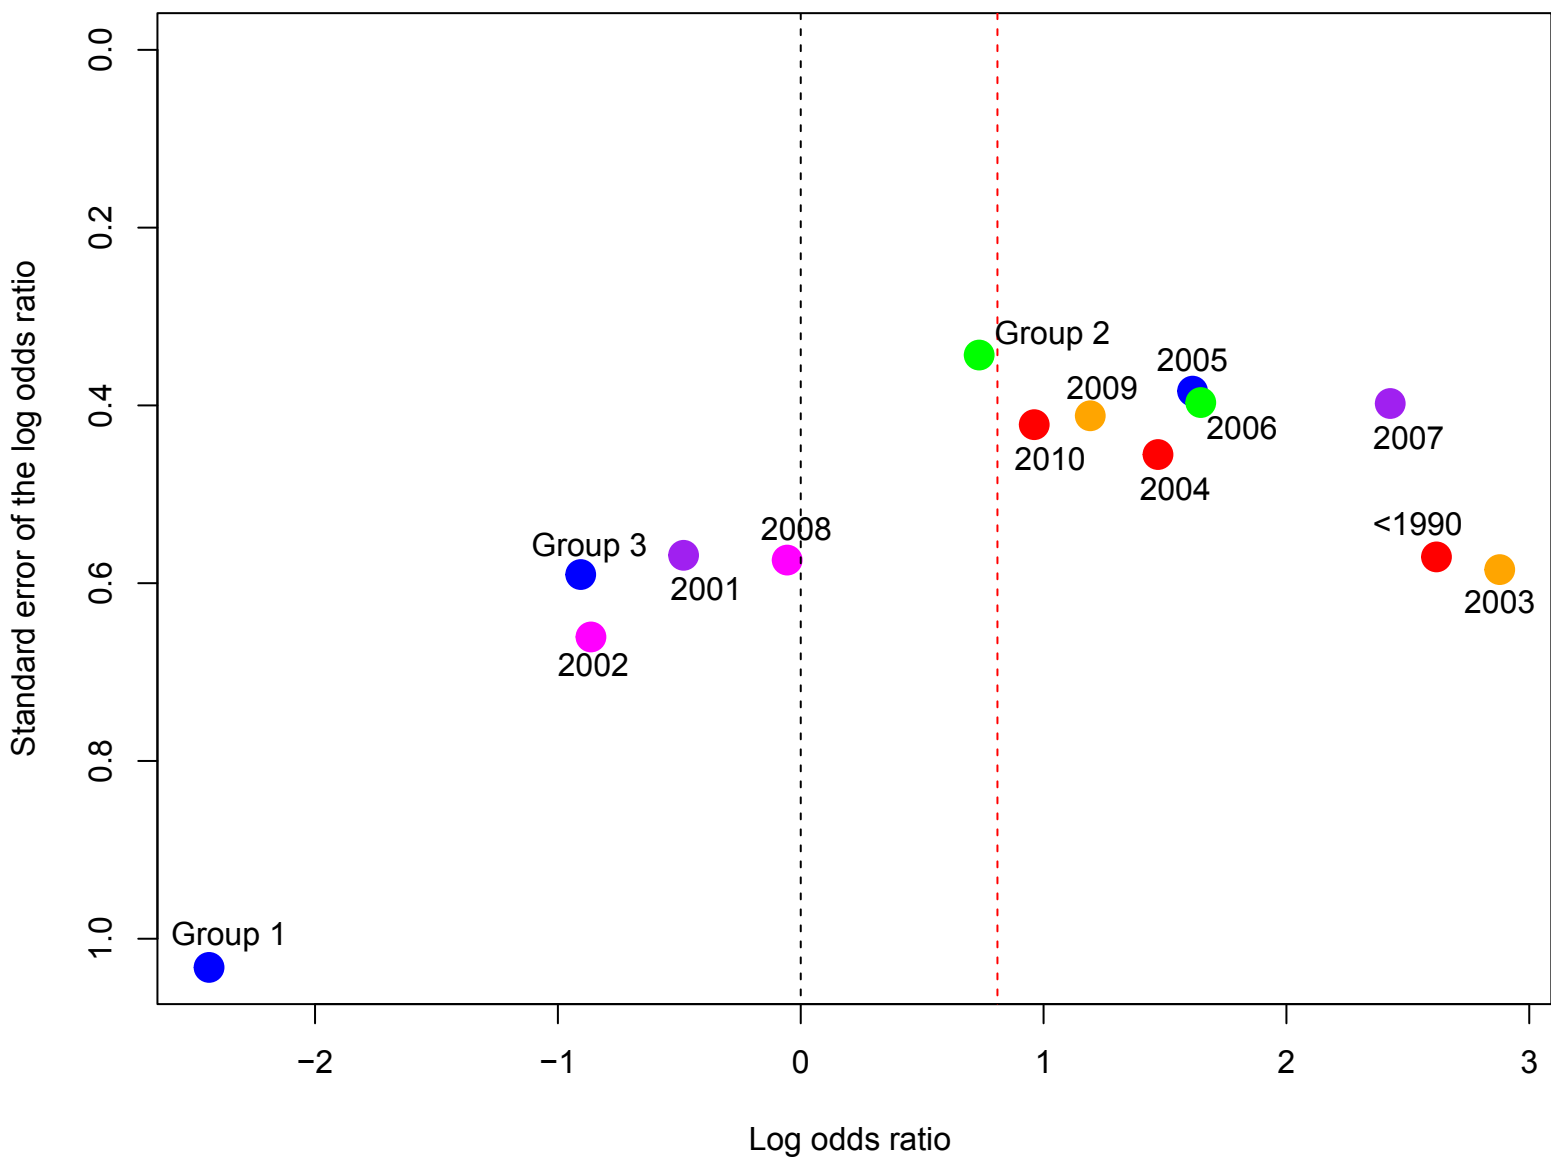

**b** **China**

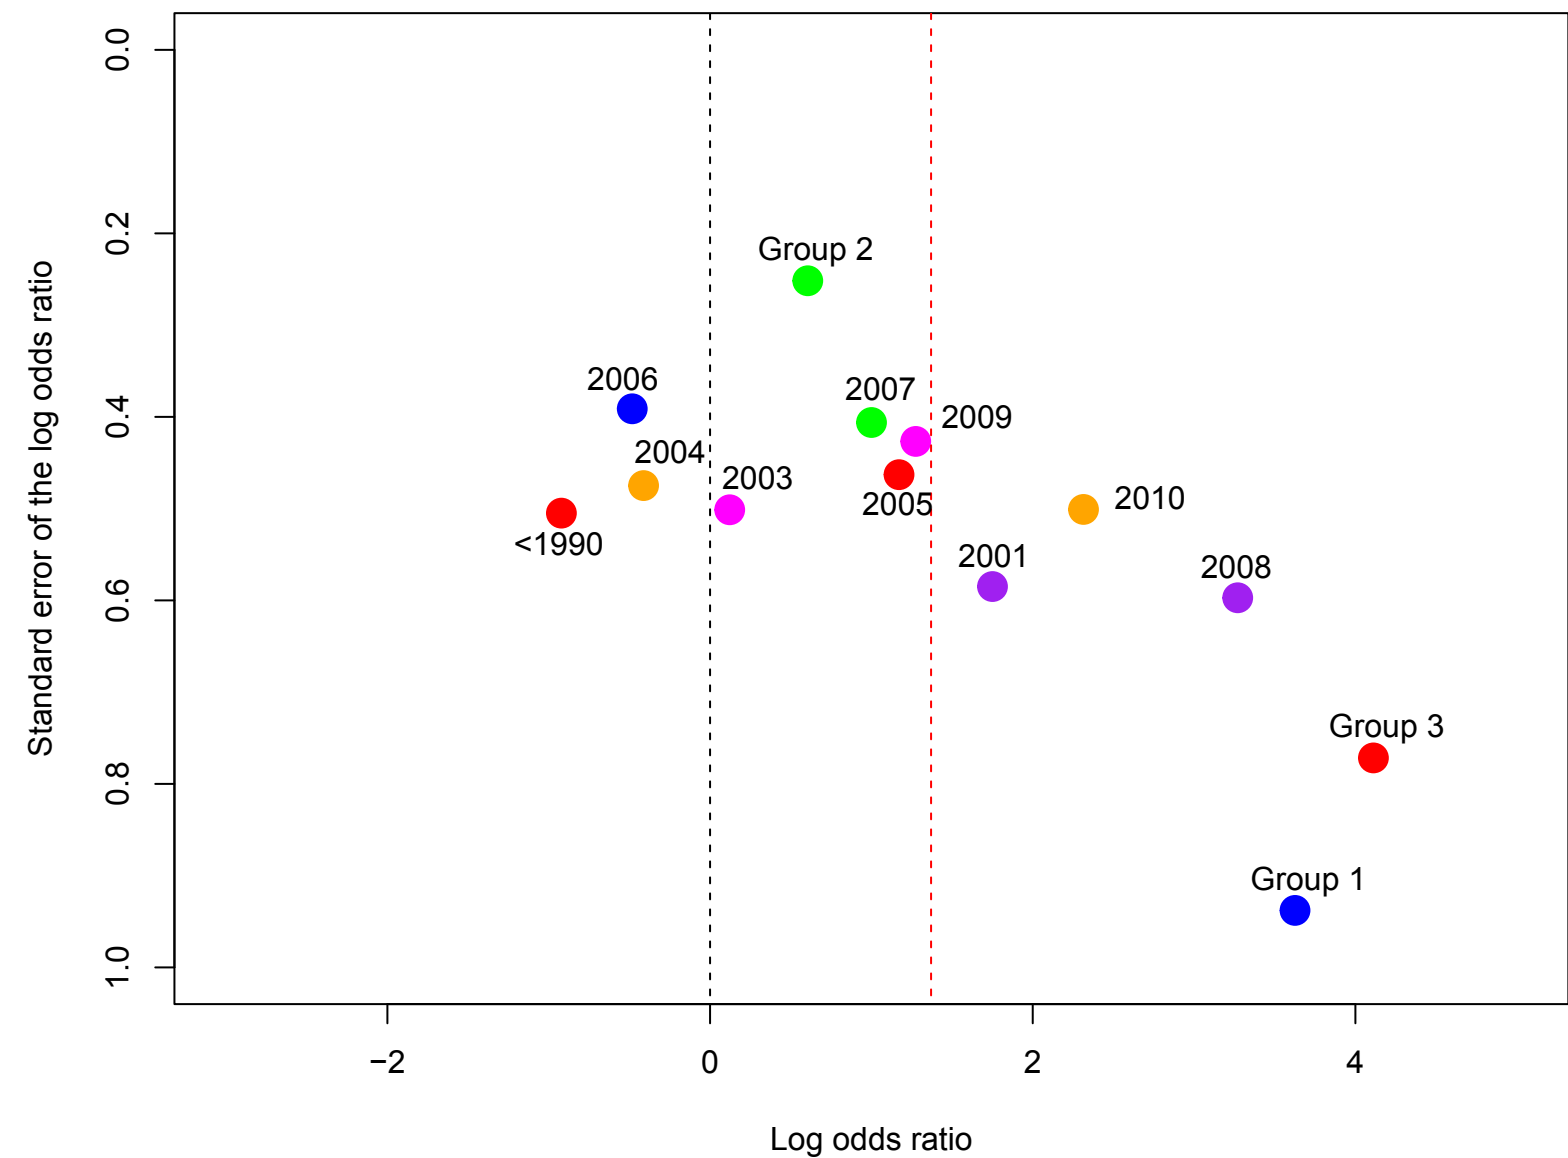

**Table S1: Table for the univariate and multivariate odds for the general additive model analysis, for the 646 reported inter and intra-subtype reassortants.**

|                         | Odds Ratio<br>(95% confidence interval) <sup>2</sup> | <i>p</i> <sup>3</sup> | Adjusted odds ratio<br>(95% confidence interval) <sup>4</sup> | <i>p</i> <sup>5</sup> |
|-------------------------|------------------------------------------------------|-----------------------|---------------------------------------------------------------|-----------------------|
| <b>Host<sup>1</sup></b> |                                                      |                       |                                                               |                       |
| Aquatic bird            | 1                                                    |                       | 1                                                             |                       |
| Equine                  | 0.25 (0.01 – 1.16)                                   |                       | 0.23 (0.03 – 1.73)                                            |                       |
| Human                   | 0.17 (0.12 – 0.22)                                   | <0.001                | 0.19 (0.14 – 0.25)                                            | <0.001                |
| Other Avian             | 1.90 (1.24 – 2.62)                                   | <0.001                | 0.89 (0.63 – 1.26)                                            |                       |
| Other                   | 0.65 (0.30 – 1.21)                                   |                       | 0.63 (0.32 – 1.25)                                            |                       |
| Poultry                 | 1.91 (1.52 – 2.40)                                   | <0.001                | 1.07 (0.83 – 1.37)                                            |                       |
| Swine                   | 2.87 (2.34 – 3.52)                                   | <0.001                | 2.48 (1.99 – 3.09)                                            | <0.001                |
| <b>Region</b>           |                                                      |                       |                                                               |                       |
| Africa                  | 1.55 (0.69 – 2.98)                                   |                       | 1.44 (0.68 – 3.04)                                            |                       |
| Asia                    | 1.73 (1.32 – 2.24)                                   | <0.001                | 2.07 (1.56 – 2.75)                                            |                       |
| Australia               | 0.25 (0.08 – 0.55)                                   | <0.01                 | 0.51 (0.20 – 1.27)                                            |                       |
| China                   | 5.24 (4.33 – 6.36)                                   | <0.001                | 3.45 (2.78 – 4.28)                                            | <0.001                |
| Europe                  | 2.01 (1.46 – 2.71)                                   | <0.001                | 1.92 (1.38 – 2.65)                                            | <0.001                |
| Japan                   | 2.74 (1.56 – 4.49)                                   | <0.001                | 2.80 (1.62 – 4.84)                                            | <0.001                |
| Middle East             | 1.07 (0.26 – 2.86)                                   |                       | 0.88 (0.27 – 2.84)                                            |                       |
| Russia                  | 1.59 (0.56 – 3.53)                                   |                       | 2.25 (0.90 – 5.64)                                            |                       |
| South America           | 0.21 (0.03 – 0.68)                                   | <0.05                 | 0.78 (0.19 – 3.24)                                            |                       |
| US                      | 1                                                    |                       | 1                                                             |                       |
| <b>Year</b>             |                                                      |                       |                                                               |                       |
| <1990                   | 1                                                    |                       |                                                               |                       |
| 1990 <sup>‡</sup>       | 0 (0 – 0)                                            |                       |                                                               |                       |
| 1991                    | 0.88 (0.21 – 2.48)                                   |                       |                                                               |                       |
| 1992                    | 1.54 (0.45 – 3.94)                                   |                       |                                                               |                       |
| 1993                    | 0.69 (0.12 – 1.74)                                   |                       |                                                               |                       |
| 1994                    | 0.27 (0.04 – 0.88)                                   | <0.1                  |                                                               |                       |
| 1995                    | 0.36 (0.04 – 1.00)                                   |                       |                                                               |                       |
| 1996                    | 0.84 (0.29 – 1.97)                                   |                       |                                                               |                       |
| 1997                    | 3.70 (2.11 – 6.31)                                   | <0.001                |                                                               |                       |
| 1998                    | 2.70 (1.49 – 4.70)                                   | <0.001                |                                                               |                       |
| 1999                    | 1.79 (1.06 – 2.95)                                   | <0.05                 |                                                               |                       |
| 2000                    | 2.10 (1.34 – 3.26)                                   | <0.001                |                                                               |                       |
| 2001                    | 1.69 (1.06 – 2.67)                                   | <0.05                 |                                                               |                       |
| 2002                    | 1.86 (1.20 – 2.86)                                   | <0.01                 |                                                               |                       |
| 2003                    | 1.33 (0.86 – 2.05)                                   |                       |                                                               |                       |
| 2004                    | 1.21 (0.78 – 1.87)                                   |                       |                                                               |                       |
| 2005                    | 1.06 (0.70 – 1.59)                                   |                       |                                                               |                       |
| 2006                    | 1.16 (0.78 – 1.74)                                   |                       |                                                               |                       |
| 2007                    | 0.74 (0.49 – 1.11)                                   |                       |                                                               |                       |
| 2008                    | 0.71 (0.48 – 1.21)                                   |                       |                                                               |                       |
| 2009                    | 0.24 (0.16 – 0.37)                                   | <0.001                |                                                               |                       |
| 2010                    | 0.63 (0.41 – 0.98)                                   | <0.05                 |                                                               |                       |
| 2011                    | 0.64 (0.38 – 1.05)                                   | <0.1                  |                                                               |                       |
| 2012                    | 0.92 (0.47 – 1.68)                                   |                       |                                                               |                       |
| 2013                    | 1.06 (0.05 – 5.20)                                   |                       |                                                               |                       |

Footnote: <sup>1</sup> The covariate and each level that was analysed when the analysis was performed. <sup>2</sup> The calculated unadjusted odds ratio for reporting inter- and intra-subtype reassortants for each covariate. Baseline levels for host, region of isolation and year are indicated in the table. Numbers in brackets indicate confidence intervals at the 95% level. <sup>3</sup> The p-value for each covariate for the unadjusted odds of reporting reassortants, calculated at the 95% significance level. <sup>4</sup> The calculated adjusted odds ratio for reporting inter- and intra-subtype reassortants for each covariate. Baseline levels for host, region of isolation and year are indicated in the table.

Numbers in brackets indicate confidence intervals at the 95% level. <sup>5</sup> The p-value for each covariate for the adjusted odds of reporting reassortants, calculated at the 95% significance level. We present the results for the univariate analysis for year, where year was treated as a categorical variable. Covaraites which have an \* next to them have an estimated OR of 0, as no data on reported reassortants was identified for them.

**Table S2: Table for the univariate and multivariate odds for the general additive model analysis, for the 416 reported inter-subtype reassortants.**

|                         | Odds Ratio<br>(95% confidence interval) <sup>2</sup> | <i>p</i> <sup>3</sup> | Adjusted odds ratio<br>(95% confidence interval) <sup>4</sup> | <i>p</i> <sup>5</sup> |
|-------------------------|------------------------------------------------------|-----------------------|---------------------------------------------------------------|-----------------------|
| <b>Host<sup>1</sup></b> |                                                      |                       |                                                               |                       |
| Aquatic bird            | 1                                                    |                       | 1                                                             |                       |
| Equine*                 | 0 (0 – 0)                                            |                       | 0 (0 – 0)                                                     |                       |
| Human                   | 0.05 (0.03 – 0.08)                                   | <0.001                | 0.05 (0.03 – 0.09)                                            | <0.001                |
| Other Avian             | 1.84 (1.25 – 2.65)                                   | <0.01                 | 0.89 (0.60 – 1.33)                                            |                       |
| Other                   | 0.75 (0.34 – 1.45)                                   |                       | 0.70 (0.34 – 1.45)                                            |                       |
| Poultry                 | 1.29 (0.96 – 1.71)                                   | <0.1                  | 0.76 (0.52 – 1.04)                                            | <0.1                  |
| Swine                   | 2.81 (2.23 – 3.53)                                   | <0.001                | 2.28 (1.78 – 2.92)                                            | <0.001                |
| <b>Region</b>           |                                                      |                       |                                                               |                       |
| Africa                  | 0.83 (0.20 – 2.22)                                   |                       | 0.89 (0.27 – 2.91)                                            |                       |
| Asia                    | 1.69 (1.22 – 2.31)                                   | <0.01                 | 2.11 (1.51 – 2.95)                                            | <0.001                |
| Australia               | 0.07 (0.004 – 0.32)                                  | <0.01                 | 0.29 (0.04 – 2.16)                                            |                       |
| China                   | 5.01 (4.00 – 6.32)                                   | <0.001                | 3.46 (2.68 – 4.47)                                            | <0.001                |
| Europe                  | 2.06 (1.42 – 2.93)                                   | <0.001                | 2.41 (1.64 – 3.55)                                            | <0.001                |
| Japan                   | 2.45 (1.19 – 4.48)                                   | <0.01                 | 2.69 (1.37 – 5.27)                                            | <0.01                 |
| Middle East             | 1.03 (0.17 – 3.29)                                   |                       | 1.02 (0.24 – 4.28)                                            |                       |
| Russia                  | 1.37 (0.33 – 3.67)                                   |                       | 2.26 (0.70 – 7.29)                                            |                       |
| South America           | 0.31 (0.05 – 0.99)                                   |                       | 1.95 (0.46 – 8.24)                                            |                       |
| US                      | 1                                                    |                       | 1                                                             |                       |
| <b>Year</b>             |                                                      |                       |                                                               |                       |
| <1990                   | 1                                                    |                       |                                                               |                       |
| 1990*                   | 0 (0 – 0)                                            |                       |                                                               |                       |
| 1991                    | 1.41 (0.22 – 4.97)                                   |                       |                                                               |                       |
| 1992                    | 2.76 (0.63 – 8.34)                                   |                       |                                                               |                       |
| 1993                    | 1.25 (0.29 – 3.73)                                   |                       |                                                               |                       |
| 1994                    | 0.65 (0.10 – 2.28)                                   |                       |                                                               |                       |
| 1995                    | 0.36 (0.04 – 1.79)                                   |                       |                                                               |                       |
| 1996                    | 1.21 (0.28 – 3.61)                                   |                       |                                                               |                       |
| 1997                    | 4.40 (1.99 – 9.27)                                   | <0.001                |                                                               |                       |
| 1998                    | 4.60 (2.18 – 9.40)                                   | <0.001                |                                                               |                       |
| 1999                    | 2.10 (0.98 – 4.31)                                   | <0.05                 |                                                               |                       |
| 2000                    | 2.90 (1.57 – 5.43)                                   | <0.001                |                                                               |                       |
| 2001                    | 2.72 (1.47 – 5.09)                                   | <0.01                 |                                                               |                       |
| 2002                    | 2.93 (1.63 – 5.37)                                   | <0.001                |                                                               |                       |
| 2003                    | 2.65 (1.52 – 4.77)                                   | <0.001                |                                                               |                       |
| 2004                    | 1.80 (0.98 – 3.33)                                   |                       |                                                               |                       |
| 2005                    | 1.52 (0.86 – 2.75)                                   |                       |                                                               |                       |
| 2006                    | 2.00 (1.17 – 3.54)                                   | <0.05                 |                                                               |                       |
| 2007                    | 1.05 (0.59 – 1.91)                                   |                       |                                                               |                       |
| 2008                    | 1.30 (0.71 – 2.42)                                   |                       |                                                               |                       |
| 2009                    | 0.42 (0.24 – 0.76)                                   | <0.01                 |                                                               |                       |
| 2010                    | 1.39 (0.80 – 2.47)                                   |                       |                                                               |                       |
| 2011                    | 1.42 (0.76 – 2.66)                                   |                       |                                                               |                       |
| 2012                    | 2.24 (1.07 – 4.55)                                   | <0.05                 |                                                               |                       |
| 2013                    | 2.57 (0.14 – 0.13)                                   |                       |                                                               |                       |

Footnote: <sup>1</sup> The covariate and each level that was analysed when the analysis was performed. <sup>2</sup> The calculated unadjusted odds ratio for reporting inter-subtype reassortants for each covariate. Baseline levels for host, region of isolation and year are indicated in the table. Numbers in brackets indicate confidence intervals at the 95% level. <sup>3</sup> The p-value for each covariate for the unadjusted odds of reporting reassortants, calculated at the 95% significance level. <sup>4</sup> The calculated adjusted odds ratio for reporting inter-subtype reassortants for each covariate. Baseline levels for host, region of isolation and year are indicated in the table. Numbers in brackets



indicate confidence intervals at the 95% level.<sup>5</sup> The p-value for each covariate for the adjusted odds of reporting reassortants, calculated at the 95% significance level. We present the results for the univariate analysis for year, where year was treated as a categorical variable. Covariates which have an \* next to them have an estimated OR of 0, as no data on reported reassortants was identified for them.

**Table S3: Table for the univariate and multivariate odds for the general additive model analysis, for the 230 reported intra-subtype reassortants.**

|                         | Odds Ratio<br>(95% confidence interval) <sup>2</sup> | <i>p</i> <sup>3</sup> | Adjusted odds ratio<br>(95% confidence interval) <sup>4</sup> | <i>p</i> <sup>5</sup> |
|-------------------------|------------------------------------------------------|-----------------------|---------------------------------------------------------------|-----------------------|
| <b>Host<sup>1</sup></b> |                                                      |                       |                                                               |                       |
| Aquatic bird            | 1                                                    |                       | 1                                                             |                       |
| Equine                  | 1.16 (0.06 – 5.39)                                   |                       | 0.87 (0.11 – 6.50)                                            |                       |
| Human                   | 0.58 (0.39 – 0.86)                                   | <0.01                 | 0.77 (0.51 – 1.17)                                            |                       |
| Other Avian             | 2.00 (0.99 – 3.70)                                   | <0.05                 | 0.98 (0.49 – 1.94)                                            |                       |
| Other                   | 0.32 (0.01 – 1.47)                                   |                       | 0.34 (0.04 – 2.51)                                            |                       |
| Poultry                 | 3.91 (2.67 – 5.71)                                   | <0.001                | 2.28 (1.51 – 3.44)                                            | <0.001                |
| Swine                   | 2.78 (1.83 – 4.19)                                   | <0.001                | 2.64 (1.70 – 4.08)                                            | <0.001                |
| <b>Region</b>           |                                                      |                       |                                                               |                       |
| Africa                  | 3.15 (1.09 – 7.21)                                   | <0.05                 | 1.89 (0.70 – 5.06)                                            |                       |
| Asia                    | 1.78 (1.10 – 2.81)                                   | <0.05                 | 1.86 (1.13–3.07)                                              |                       |
| Australia               | 0.66 (0.20 – 1.62)                                   |                       | 0.53 (0.13 – 2.16)                                            |                       |
| China                   | 5.23 (3.75 – 7.36)                                   | <0.001                | 3.00 (2.06–4.36)                                              | <0.001                |
| Europe                  | 1.83 (1.01 – 3.14)                                   | <0.05                 | 1.30 (0.73 – 2.31)                                            |                       |
| Japan                   | 3.27 (1.25 – 7.08)                                   | <0.01                 | 3.02 (1.27–7.20)                                              | <0.05                 |
| Middle East             | 1.16 (0.06 – 5.32)                                   |                       | 0.62 (0.08 – 4.64)                                            |                       |
| Russia                  | 2.05 (0.33 – 6.66)                                   |                       | 2.19 (0.52–9.15)                                              |                       |
| South America           | 0 (0 – 0)                                            |                       | 0 (0 – 0)                                                     |                       |
| US                      | 1                                                    |                       | 1                                                             |                       |
| <b>Year</b>             |                                                      |                       |                                                               |                       |
| <1990                   | 1                                                    |                       |                                                               |                       |
| 1990*                   | 0 (0 – 0)                                            |                       |                                                               |                       |
| 1991                    | 0.50 (0.02 – 2.43)                                   |                       |                                                               |                       |
| 1992                    | 0.65 (0.03 – 3.12)                                   |                       |                                                               |                       |
| 1993                    | 0.30 (0.01 – 1.42)                                   |                       |                                                               |                       |
| 1994                    | 0 (0 – 0)                                            |                       |                                                               |                       |
| 1995                    | 0.26 (0.01 – 1.27)                                   |                       |                                                               |                       |
| 1996                    | 0.58 (0.09 – 1.98)                                   |                       |                                                               |                       |
| 1997                    | 2.88 (1.30 – 5.92)                                   | <0.01                 |                                                               |                       |
| 1998                    | 1.23 (0.41 – 3.00)                                   |                       |                                                               |                       |
| 1999                    | 1.52 (0.73 – 3.00)                                   |                       |                                                               |                       |
| 2000                    | 1.44 (0.75 – 2.70)                                   |                       |                                                               |                       |
| 2001                    | 0.92 (0.43 – 1.83)                                   |                       |                                                               |                       |
| 2002                    | 1.04 (0.52 – 1.97)                                   |                       |                                                               |                       |
| 2003                    | 0.38 (0.15 – 0.84)                                   | <0.001                |                                                               |                       |
| 2004                    | 0.77 (0.39 – 1.45)                                   |                       |                                                               |                       |
| 2005                    | 0.72 (0.40 – 1.28)                                   |                       |                                                               |                       |
| 2006                    | 0.55 (0.29 – 1.03)                                   | <0.1                  |                                                               |                       |
| 2007                    | 0.51 (0.28 – 0.92)                                   | <0.05                 |                                                               |                       |
| 2008                    | 0.39 (0.17 – 0.78)                                   | <0.05                 |                                                               |                       |
| 2009                    | 0.12 (0.06 – 0.23)                                   | <0.001                |                                                               |                       |
| 2010                    | 0.10 (0.03 – 0.27)                                   | <0.001                |                                                               |                       |
| 2011                    | 0.09 (0.01 – 0.30)                                   | <0.01                 |                                                               |                       |
| 2012                    | 0 (0 – 0)                                            |                       |                                                               |                       |
| 2013                    | 0 (0 – 0)                                            |                       |                                                               |                       |

**Footnote:** <sup>1</sup> The covariate and each level that was analysed when the analysis was performed. <sup>2</sup> The calculated unadjusted odds ratio for reporting intra-subtype reassortants for each covariate. Baseline levels for host, region of isolation and year are indicated in the table. Numbers in brackets indicate confidence intervals at the 95% level. <sup>3</sup> The p-value for each covariate for the unadjusted odds of reporting reassortants, calculated at the 95% significance level. <sup>4</sup> The calculated adjusted odds ratio for reporting intra-subtype reassortants for each covariate. Baseline levels for host, region of isolation and year are indicated in the table. Numbers in brackets

indicate confidence intervals at the 95% level.<sup>5</sup> The p-value for each covariate for the adjusted odds of reporting reassortants, calculated at the 95% significance level. We present the results for the univariate analysis for year, where year was treated as a categorical variable. Covaraites which have an \* next to them have an estimated OR of 0, as no data on reported reassortants was identified for them.
