# Supplementary material for: A systematic review of reported reassortant viral lineages of influenza A
Source: Springer Nature journal article supplement (doi:10.1186/s12879-015-1298-9), 2015-12-01

# H1 Swine

- Reassorted data
- Random sample data

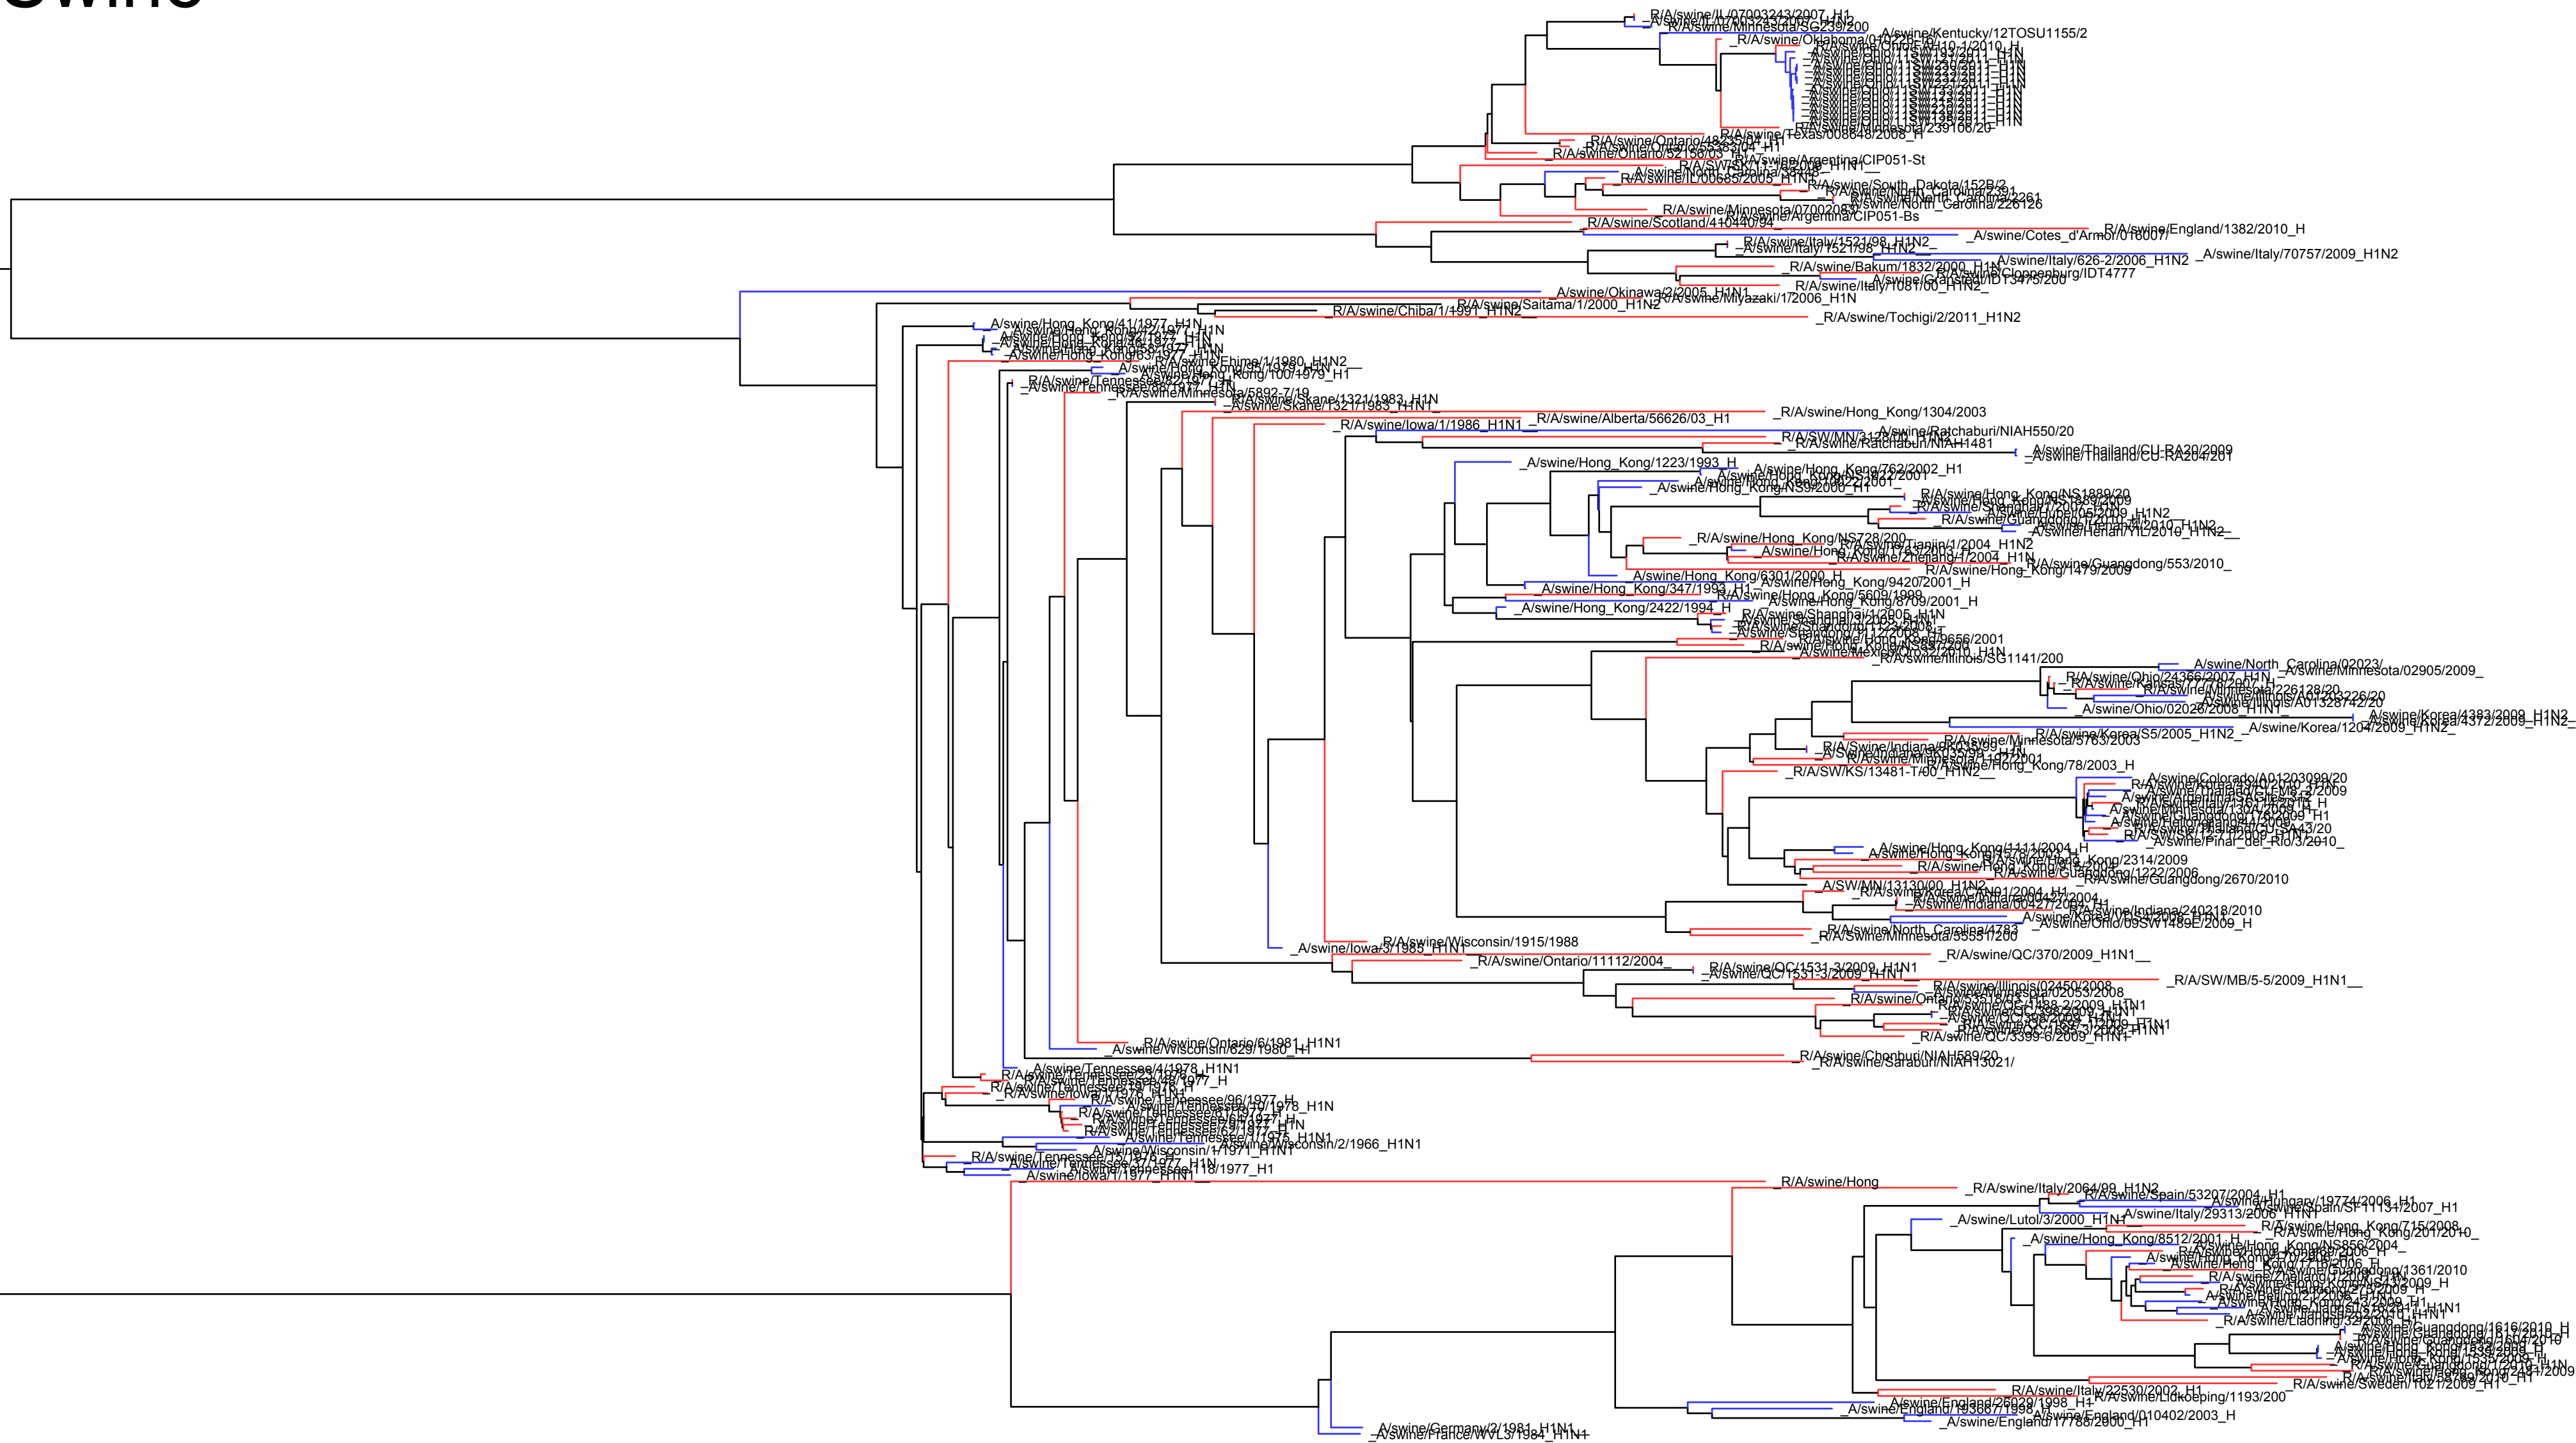

0.04

# H5 Avian

Reassorted data  
Random sample data

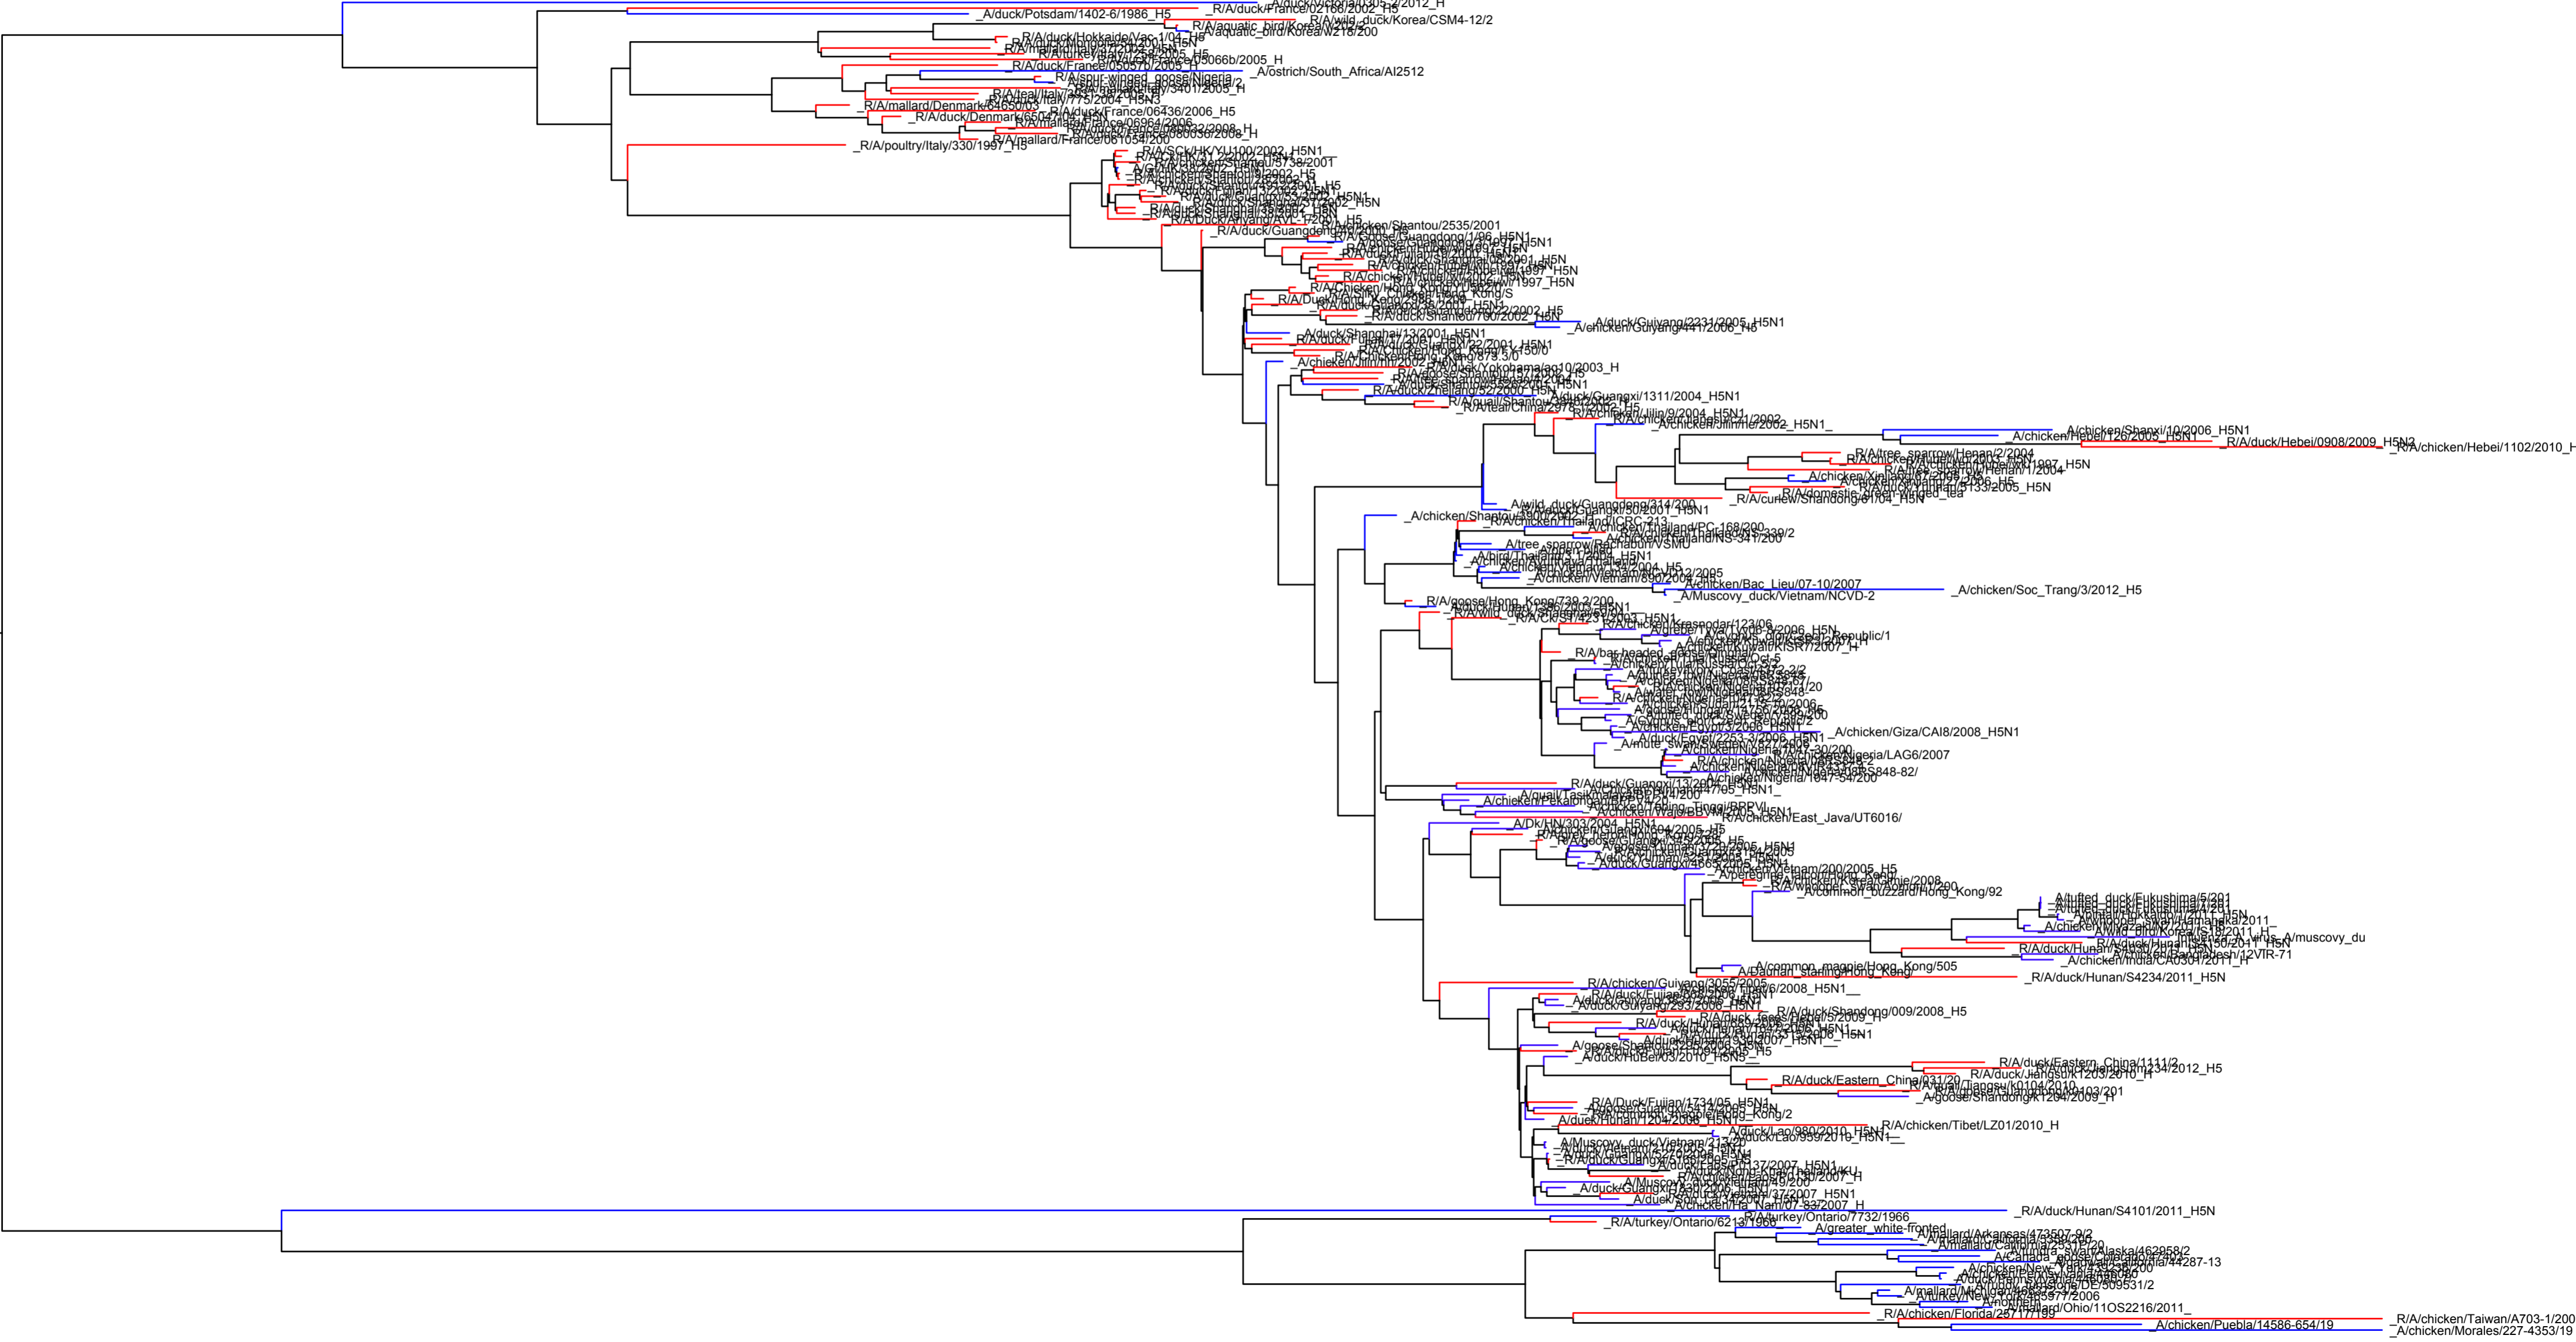

Supplement: MOESM7 [file 9740614]
