# Supplementary material for: A systematic review of reported reassortant viral lineages of influenza A
Source: BMC Infect Dis. 2016 Jan 5;16:3. doi: 10.1186/s12879-015-1298-9 (PMC4702296; doi:10.1186/s12879-015-1298-9)
Supplement: Supplementary file 5 — Regression analysis without highly homologous isolates removed. (PDF 171 kb) [file 12879_2015_1298_MOESM5_ESM.pdf]

**Table S6: Table for the univariate and multivariate odds for the general additive model analysis, for the 731 FRIs initially identified in the review.**

|                          | Odds Ratio<br>(95% confidence<br>interval) <sup>2</sup> | <i>p</i> <sup>3</sup> | Adjusted odds ratio<br>(95% confidence interval) <sup>4</sup> | <i>p</i> <sup>5</sup> |
|--------------------------|---------------------------------------------------------|-----------------------|---------------------------------------------------------------|-----------------------|
| <b>Host</b> <sup>1</sup> |                                                         |                       |                                                               |                       |
| Aquatic bird             | 1                                                       |                       | 1                                                             |                       |
| Equine                   | 0.5 (0.08 – 1.59)                                       |                       | 0.39 (0.06 – 1.28)                                            |                       |
| Human                    | 0.25 (0.20 – 0.32)                                      | <0.001                | 0.30 (0.23 – 0.39)                                            | <0.001                |
| Other Avian              | 1.96 (1.41 – 2.68)                                      | <0.001                | 0.97 (0.68 – 1.35)                                            |                       |
| Other                    | 0.63 (0.29 – 1.16)                                      |                       | 0.63 (0.29 – 1.18)                                            |                       |
| Poultry                  | 2.11 (1.69 – 2.61)                                      | <0.001                | 1.21 (0.95 – 1.53)                                            |                       |
| Swine                    | 3.11 (2.55 – 3.78)                                      | <0.001                | 2.73 (2.20 – 3.39)                                            | <0.001                |
| <b>Region</b>            |                                                         |                       |                                                               |                       |
| Africa                   | 1.53 (0.72 – 2.84)                                      |                       | 1.31 (0.60 – 2.53)                                            |                       |
| Asia                     | 1.78 (1.39 – 2.27)                                      | <0.001                | 2.18 (1.67 – 2.83)                                            | <0.001                |
| Australia                | 0.35 (0.15 – 0.67)                                      | <0.01                 | 0.53 (0.23 – 1.04)                                            |                       |
| China                    | 5.00 (4.18 – 6.00)                                      | <0.001                | 3.27 (2.66 – 4.03)                                            | <0.001                |
| Europe                   | 2.14 (1.61 – 2.82)                                      | <0.001                | 1.87 (1.37 – 2.52)                                            | <0.001                |
| Japan                    | 2.71 (1.59 – 4.32)                                      | <0.001                | 2.61 (1.50 – 4.29)                                            | <0.001                |
| Middle East              | 0.93 (0.23 – 2.49)                                      |                       | 0.73 (0.17 – 2.01)                                            |                       |
| Russia                   | 1.38 (0.48 – 3.07)                                      |                       | 1.96 (0.68 – 4.43)                                            |                       |
| South America            | 0.28 (0.07 – 0.75)                                      | <0.05                 | 0.87 (0.21 – 2.36)                                            |                       |
| US                       | 1                                                       |                       | 1                                                             |                       |
| <b>Year</b>              |                                                         |                       |                                                               |                       |
| <1990                    | 1                                                       |                       |                                                               |                       |
| 1990                     | 0.38 (0.02 – 1.81)                                      |                       |                                                               |                       |
| 1991                     | 0.87 (0.26 – 2.17)                                      |                       |                                                               |                       |
| 1992                     | 1.12 (0.33 – 2.82)                                      |                       |                                                               |                       |
| 1993                     | 1.17 (0.53 – 2.30)                                      |                       |                                                               |                       |
| 1994                     | 0.29 (0.07 – 0.81)                                      | <0.05                 |                                                               |                       |
| 1995                     | 0.22 (0.03 – 0.72)                                      | <0.05                 |                                                               |                       |
| 1996                     | 1.00 (0.43 – 2.04)                                      |                       |                                                               |                       |
| 1997                     | 2.99 (1.76 – 4.91)                                      | <0.001                |                                                               |                       |
| 1998                     | 2.59 (1.53 – 4.23)                                      | <0.001                |                                                               |                       |
| 1999                     | 1.90 (1.21 – 2.92)                                      | <0.01                 |                                                               |                       |
| 2000                     | 1.70 (1.12 – 2.54)                                      | <0.05                 |                                                               |                       |
| 2001                     | 1.31 (0.85 – 1.99)                                      |                       |                                                               |                       |
| 2002                     | 1.49 (1.00 – 2.21)                                      | <0.05                 |                                                               |                       |
| 2003                     | 1.02 (0.68 – 1.52)                                      |                       |                                                               |                       |
| 2004                     | 0.97 (0.65 – 1.44)                                      |                       |                                                               |                       |
| 2005                     | 0.80 (0.55 – 1.16)                                      |                       |                                                               |                       |
| 2006                     | 0.89 (0.61 – 1.28)                                      |                       |                                                               |                       |
| 2007                     | 0.59 (0.40 – 0.85)                                      | <0.01                 |                                                               |                       |
| 2008                     | 0.68 (0.45 – 1.06)                                      |                       |                                                               |                       |
| 2009                     | 0.19 (0.13 – 0.28)                                      | <0.001                |                                                               |                       |
| 2010                     | 0.48 (0.32 – 0.72)                                      | <0.001                |                                                               |                       |
| 2011                     | 0.46 (0.28 – 0.74)                                      | <0.01                 |                                                               |                       |
| 2012                     | 0.67 (0.35 – 1.20)                                      |                       |                                                               |                       |
| 2013                     | 0.77 (0.04 – 3.75)                                      |                       |                                                               |                       |

Footnote: <sup>1</sup> The covariate and each level that was analysed when the analysis was performed. <sup>2</sup> The calculated unadjusted odds ratio for reporting inter-subtype reassortants for each covariate. Baseline levels for host, region of isolation and year are indicated in the table. Numbers in brackets indicate confidence intervals at the 95% level. <sup>3</sup> The p-value for each covariate for the unadjusted odds of reporting reassortants, calculated at the 95%

significance level.<sup>4</sup> The calculated adjusted odds ratio for reporting inter-subtype reassortants for each covariate. Baseline levels for host, region of isolation and year are indicated in the table. Numbers in brackets indicate confidence intervals at the 95% level.<sup>5</sup> The p-value for each covariate for the adjusted odds of reporting reassortants, calculated at the 95% significance level. We present the results for the univariate analysis for year, where year was treated as a categorical variable.
